## **Polarised subcellular activation of ROPs by specific ROPGEFs drives pollen germination in *Arabidopsis thaliana***

### **Authors:**

Alida Melissa Bouatta<sup>1</sup>, Andrea Lepper<sup>1</sup>, Philipp Denninger<sup>1,\*</sup>

<sup>1</sup> Technical University of Munich, School of Life Sciences, Plant Systems Biology,  
Emil-Ramann-Strasse 8, 85354 Freising, Germany

\* Corresponding author:

Email: [philipp.denninger@tum.de](mailto:philipp.denninger@tum.de), ORCID ID: <https://orcid.org/0000-0003-3794-2360>

### 1 **Abstract**

2 During plant fertilisation, excess male gametes compete for a limited number of female  
3 gametes. The dormant male gametophyte, encapsulated in the pollen grain, consists of two  
4 sperm cells enclosed in a vegetative cell. After reaching the stigma of a compatible flower,  
5 quick and efficient germination of the vegetative cell to a tip-growing pollen tube is crucial to  
6 ensure fertilisation success. RHO OF PLANTS (ROP) signalling and their activating ROP  
7 GUANINE NUCLEOTIDE EXCHANGE FACTORS (ROPGEFs) are essential for initiating  
8 polar growth processes in multiple cell types. However, which ROPGEFs activate pollen  
9 germination is unknown. We investigated the role of ROPGEFs in initiating pollen germination  
10 and the required cell polarity establishment. Of the five pollen-expressed ROPGEFs, we found  
11 that GEF8, GEF9, and GEF12 are required for pollen germination and male fertilisation  
12 success, as *gef8;gef9;gef12* triple mutants showed almost complete loss of pollen germination  
13 *in vitro* and had a reduced allele transmission rate. Live cell imaging and spatiotemporal  
14 analysis of subcellular protein distribution showed that GEF8 and GEF9, but not GEF12,  
15 displayed transient polar protein accumulations at the future site of pollen germination minutes  
16 before pollen germination, demonstrating specific roles for GEF8 and GEF9 during the  
17 initiation of pollen germination. Furthermore, this novel GEF accumulation appears in a  
18 biphasic temporal manner and can shift its location. We showed that the C-terminal domain of  
19 GEF8 and GEF9 confers this protein accumulation and demonstrated that GEFs locally  
20 activate ROPs and alter Ca<sup>2+</sup> signalling, which is required for pollen tube germination. We  
21 demonstrated that GEFs do not act redundantly during pollen germination and described for  
22 the first time a polar domain with spatiotemporal flexibility, which is crucial for the *de novo*  
23 establishment of a polar growth domain within a cell and, thus, for pollen function and  
24 fertilisation success.

## 25 **Introduction**

26 Sexual reproduction is a fundamental and complex process in which male and female gametes  
27 fuse to form a zygote, which develops into an embryo. In Angiosperms, sperm cells have lost  
28 their motility, and the male gametes must be delivered to the female gametes. This is achieved  
29 by a tip-growing pollen tube formed by the vegetative pollen cell, which encloses two sperm  
30 cells. This pollen tube grows from the papilla cells of the stigma on the flower surface into the  
31 transmitting tract toward the female gametophyte inside the ovary. After reaching the female  
32 gametophyte, the pollen tube ruptures and releases its enclosed sperm cells. In the last step  
33 of double fertilisation, which is characterised by defined  $\text{Ca}^{2+}$  signals in the female gametes,  
34 the sperm cells subsequently fuse with the egg cell and the central cell to form the zygote and  
35 the endosperm, respectively (Dresselhaus and Franklin-Tong, 2013; Bleckmann et al., 2014;  
36 Denninger et al., 2014; Hamamura et al., 2014; Sprunck, 2020).

37 To protect the male gametophyte from environmental influences on its way to a compatible  
38 flower, it is metabolically inactive, desiccated, and encapsulated in a thick and rigid pollen  
39 coat, forming the pollen grain. Once on the stigma of a compatible flower, the vegetative cell  
40 needs to be activated and polarise the tip growth machinery to a defined subcellular region to  
41 germinate from the pollen grain (Edlund et al., 2004; Rudall and Bateman, 2007). Pollen grains  
42 have apertures, areas in which the pollen coat is thinner, which predefine the possible  
43 emergence regions of the pollen tube in most angiosperms. However, in some species, such  
44 as *Arabidopsis thaliana*, the pollen emergence site is independent of these apertures and is  
45 predominantly defined by the contact site to the papilla cells. This requires sensing the contact  
46 site and a growth machinery, which can be polarised independently of the pollen morphology  
47 to loosen the pollen coat locally and allow the pollen tube's subsequent polar emergence  
48 (Edlund et al., 2004). Moreover, in most Angiosperms, the number of pollen grains exceeds  
49 the number of female gametes, causing competition between the individual pollen grains.  
50 Thus, the rapid establishment of cell polarity and polar growth initiation required for pollen  
51 germination is crucial in this competition and is decisive for fertilisation success. (Dresselhaus  
52 et al., 2016; Sprunck, 2020). The factors responsible for sensing the papilla-pollen contact site  
53 and the polarisation of the tip growth machinery in pollen grains are unknown. Moreover, the  
54 proteins required to transmit this polarisation signal to the tip growth machinery have yet to be  
55 discovered. Therefore, we investigated this crucial aspect of pollen germination.

56 During pollen tube tip growth, multiple RECEPTOR-LIKE KINASES (RLKs), like POLLEN  
57 RECEPTOR KINASEs (PRKs), BUDDHA'S PAPER SEAL (BUPS), or ANXUR (ANX) RLKs  
58 were shown to be required for pollen tube growth. BUPS and ANX RLKs are crucial for  
59 maintaining pollen tube integrity and preventing the rupture of germinated pollen tubes  
60 (Boisson-Dernier et al., 2009; Miyazaki et al., 2009; Ge et al., 2017). PRKs promote general  
61 pollen tube growth and are required for chemotaxis towards the female gametophyte (Mu et

62 al., 1994; Tang et al., 2004; Chang et al., 2013; Takeuchi and Higashiyama, 2016). PRKs  
63 were also proposed to sense stigmatic signal peptides in Tomato and thus activate pollen  
64 germination, but no general germination-promoting function for these RLKs is shown  
65 (Muschietti et al., 1998; Tang et al., 2004; Chang et al., 2013). Thus, it is still unknown whether  
66 PRKs play a general role in pollen activation and germination or which proteins are crucial for  
67 initiating pollen activation.

68 In various cell types and processes, RLKs activate RHO OF PLANTS (ROP) signalling  
69 pathways to establish cell polarity, promote polar growth, or confer immune responses  
70 (Kaothien et al., 2005; Duan et al., 2010; Feiguelman et al., 2018; Liu et al., 2021; Lin et al.,  
71 2022). ROP signalling pathways are mediated by plant-specific ROP GTPases, which are part  
72 of the Rho family of small GTP-binding proteins that act as molecular switches and cycle  
73 between an inactive GDP-bound state to an active GTP-bound state (Lin et al., 1996; Kost et  
74 al., 1999b; Feiguelman et al., 2018). In their active state, ROPs interact with ROP  
75 INTERACTING PARTNER (RIP) and ROP INTERACTING CRIB-CONTAINING PROTEIN  
76 (RIC) proteins, which facilitate the specific activation of downstream pathways that are  
77 required for polar growth (Holdaway-Clarke and Hepler, 2003; Shichrur and Yalovsky, 2006;  
78 Nagawa et al., 2010; Steinhorst and Kudla, 2013; Feiguelman et al., 2018). During pollen tube  
79 tip growth, ROPs are essential for cell polarisation and to promote tip growth (Lin et al., 1996;  
80 Kost et al., 1999a). Recently, it was shown that ROP signalling is additionally crucial for pollen  
81 germination, as the quadruple mutant *rop1;3;5;9* of all redundant, pollen-expressed ROPs is  
82 sterile and incapable of pollen germination (Xiang et al., 2023). As ROP signalling is required  
83 for pollen germination, we hypothesise that activators of ROP signalling are also crucial for  
84 pollen germination. However, it is unknown which ROP activators are required for pollen  
85 germination.

86 The activation of ROPs is stimulated by ROP-specific GUANINE EXCHANGE FACTORS  
87 (ROPGEFs), which facilitate the exchange from GDP to GTP. *Arabidopsis thaliana* has 14 of  
88 these ROPGEFs, hereafter called GEFs, which contain a conserved PLANT-SPECIFIC ROP  
89 NUCLEOTIDE EXCHANGER (PRONE) domain and variable termini (Berken et al., 2005; Bos  
90 et al., 2007; Zhang et al., 2010; Lin et al., 2012; Miyawaki and Yang, 2014). The PRONE  
91 domain forms a homodimer in which each protein binds a ROP protein and catalyses the  
92 nucleotide exchange of the GTPase, as demonstrated by the structure of ROP4 together with  
93 the PRONE domain of GEF8 (Thomas et al., 2007; Berken and Wittinghofer, 2008). Individual  
94 GEFs exhibit specific expression patterns and functions in different cell types and polarity  
95 processes. We showed that GEF3, together with the previously known GEF4, is highly  
96 expressed in root hairs and promotes polarity establishment or root hair growth (Duan et al.,  
97 2010; Denninger et al., 2019). Specific GEFs are establishing the membrane domains required  
98 for xylem development, and we showed that particular GEFs are expressed during phloem

99 differentiation (Nagashima et al., 2018; Roszak et al., 2021). Additionally to other processes,  
100 such as hormone signalling or pavement cell morphogenesis, GEFs were extensively studied  
101 in pollen tube tip growth (Kaothien et al., 2005; Zhang and McCormick, 2007; Yu et al., 2012;  
102 Chang et al., 2013; Feiguelman et al., 2018; Lin et al., 2022).

103 Of the 14 GEFs of *Arabidopsis thaliana*, multiple are expressed in mature pollen grains, and  
104 four are reliably detected in transcriptomic and proteomic approaches (Supplemental Figure  
105 S1) (Mergner et al., 2020). Previous studies mainly focused on GEF12 and investigated its  
106 role in growing pollen tubes and activating ROP signalling during tip growth. This showed that  
107 the activity of GEFs is promoted by phosphorylation of their C-termini by PRK RLKs or  
108 controlled by the cytosolic AGCVIII protein kinases AGC1.5 and AGC1.7, which phosphorylate  
109 the PRONE domain of GEFs. Overexpression or misregulation of GEFs resulted in a loss of  
110 polarity, pollen tube swelling, and unidirectional growth, while loss of GEF function led to  
111 shorter pollen tubes (Zhang and McCormick, 2007; Nagawa et al., 2010; Chang et al., 2013;  
112 Zhao et al., 2013; Li et al., 2018; Li et al., 2020). As for ROPs, redundancy between multiple  
113 GEFs was indicated during pollen tube growth. A *gef1/gef9/gef12/gef14* quadruple mutant  
114 displayed a mild reduction in pollen tube length, but only two of the mutated *GEFs* are  
115 expressed in pollen (Chang et al., 2013). Recently, a *gef8/gef9/gef11/gef12/gef13* quintuple  
116 mutant of all known pollen-expressed *GEFs* showed a decrease in pollen tube integrity during  
117 tip growth and reduced fertility (Zhou et al., 2023). These studies show the importance of  
118 GEFs in promoting and maintaining polar growth and, thus, male fertility. However, they only  
119 investigated pollen tube tip growth. The role of GEFs during pollen germination and which of  
120 these GEFs initiates and activates the growth process still need to be discovered.

121 Compared to the redundancy found among ROPs, GEFs can have specific functions during  
122 the establishment of a new polar domain and polar growth initiation. In root hairs, we showed  
123 that establishing the polar growth domain and tip growth are two processes activated by  
124 distinct GEFs. GEF3 is required to establish the root hair initiation domain and the polarisation  
125 of ROP2, while GEF4 drives the subsequent tip growth (Denninger et al., 2019). In pollen tube  
126 germination, a polar growth domain must be established quickly from a dormant cell to provide  
127 an advantage over competing pollen. Moreover, in *Arabidopsis*, this polar protein  
128 accumulation must be spatially flexible, as the area of pollen tube germination is not  
129 predetermined and is defined by the region in contact with the papilla cells (Edlund et al., 2004;  
130 Dresselhaus and Franklin-Tong, 2013). Therefore, pollen germination is a great model for  
131 studying the *de novo* formation of polar protein domains at the plasma membrane and  
132 understanding the spatiotemporal processes required to initiate polar growth. As GEF proteins  
133 have not been investigated during pollen germination, we investigated their role in this process  
134 to understand how GEFs activate ROP signalling in a spatiotemporally controlled manner to  
135 allow the *de novo* establishment of polar cellular growth.



136 We focused our research on the pollen-specific ROPGEFs (GEF8, GEF9, GEF11, GEF12,  
137 and GEF13) during pollen germination (Mergner et al., 2020) and show that GEFs are  
138 distinctively crucial for pollen germination and male fertility. We demonstrate that GEF8 and  
139 GEF9, but not GEF11 and GEF12, form a transient polar domain at the plasma membrane of  
140 the pollen germination site and that these GEFs drive polar ROP activation and cellular growth.  
141 This novel subcellular localisation highlights that GEFs have specific roles during cellular  
142 processes. Furthermore, this GEF accumulation appears in a biphasic temporal manner and  
143 can shift its location. This is the first description of a polar domain with such flexibility, which  
144 is crucial for polarity establishment, hence, pollen function and fertilisation success.

145

## 146 **Results**

### 147 **GEF8 and GEF9 biphasically accumulate at the pollen germination site**

148 In flowering plants, pollen germination is essential for male fertility and, thus, successful  
149 double fertilisation. Therefore, it is crucial to understand the molecular mechanisms activating  
150 pollen germination upstream of the essential ROP proteins (Xiang et al., 2023). Even though  
151 multiple GEFs were shown to be involved in pollen tube growth, the GEFs involved in ROP  
152 activation during pollen germination still need to be determined (Chang et al., 2013; Zhou et  
153 al., 2023). To investigate the role of GEFs during pollen tube germination, we focused on five  
154 GEF proteins (GEF8, GEF9, GEF11, GEF12, and GEF13) that had been found to be  
155 expressed in mature pollen (Supplemental Figure S1) (Mergner et al., 2020). We fused these  
156 five GEFs N-terminally with the yellow fluorescing protein mCitrine (mCit) under the control of  
157 their endogenous promoter fragments to confirm their expression. We found mCit-GEF8,  
158 mCit-GEF9, mCit-GEF11, and mCit-GEF12 signals in mature pollen, but no signal was  
159 observed for mCit-GEF13 (Figure 1 and Supplemental Figure S2). We assessed mCit-GEF  
160 localisation by live cell imaging in germinating pollen grains *in vitro* on pollen germination  
161 medium (PGM) (Vogler et al. 2014). Shortly after imbibition on PGM, all GEFs showed a  
162 similar localisation and were evenly distributed in the cytoplasm (Figure 1, Supplemental  
163 Figure S2 and Supplemental Video 1-3). After several minutes of imbibition on PGM, we  
164 observed that mCit-GEF8 and mCit-GEF9 accumulated at a defined region in the cell  
165 periphery, which strongly correlated with the future germination site. Such an accumulation  
166 was never observed for mCit-GEF11, mCit-GEF12, or mCit-GEF13 expressed under the  
167 control of a *GEF12* promoter (Figure 1, Supplemental Figure S2, and Supplemental Video 1-  
168 3, 19-20). This indicates a specific function of GEF8 and GEF9 during pollen germination  
169 initiation. To further characterise this behaviour, we quantitatively compared the timing of  
170 protein accumulation. We defined the first frame of a visibly emerged pollen tube as a  
171 reference timepoint 0, with negative time points before and positive time points after this  
172 reference point. By quantifying the timing of mCit-GEF8 and mCit-GEF9 accumulations using

173 multiple kymographs, we observed that both proteins showed a biphasic accumulation that,  
174 on average, slightly differed between mCit-GEF8 and mCit-GEF9 (Figure 1A-D). The initial  
175 accumulation of mCit-GEF8 and mCit-GEF9 started in a small region of the pollen grain  
176 periphery and grew to 3-4  $\mu\text{m}$  within, on average, 3 minutes for mCit-GEF8 and 5 minutes for  
177 mCit-GEF9. The maximum of this initial accumulation was reached, on average, at timepoint  
178 -11 min before germination for mCit-GEF8 and -9 min for mCit-GEF9, depicting a faster and  
179 earlier accumulation of GEF8 compared to GEF9 (Figures 1C and 1D). However, it should be  
180 noted that the timing of mCit-GEF8 accumulation was more consistent, which leads to a  
181 clearer profile of the average intensity blot. In contrast, mCit-GEF9 accumulation was stronger  
182 but less consistent in its timing, which causes a less concise profile of the average intensity  
183 blot (Figures 1C and 1D). For mCit-GEF8 and mCit-GEF9, the timing of this initial  
184 accumulation, which we considered the germination initiation, was variable, and the timepoint  
185 of the maximal accumulation is specifically indicated (Figure 1A, "germination initiation"). The  
186 overall timing and persistence of this protein accumulation can be observed in the  
187 corresponding kymographs (Figure 1B). The initial accumulation of mCit-GEF8 and mCit-  
188 GEF9 did not persist at the future germination site but disappeared after, on average, 3  
189 minutes for mCit-GEF8 and 7 minutes for mCit-GEF9. Around the time of germination, we  
190 observed a second accumulation of GEF8 and GEF9 around the initial accumulation site,  
191 which also differed in timing between both proteins. mCit-GEF8 reaccumulated at timepoint -  
192 2 min before pollen germination, while GEF9 accumulation started after germination (Figure  
193 1C and 1D). This slightly different timing of the biphasic accumulation indicates that during the  
194 initiation phase of pollen germination, either GEF8 or GEF9 are accumulated at the pollen  
195 germination site. Interestingly, we observed that the second accumulation of mCit-GEF8/  
196 mCit-GEF9 was sometimes slightly shifted laterally compared to the first accumulation before  
197 germination. However, both sites were always near each other, indicating a certain flexibility  
198 during the assembly of all required proteins of the tip growth machinery (Figure 1A and 1B  
199 and Supplemental Video 1). Such flexibility of the polar growth domain is crucial for pollen  
200 function, especially in species like *Arabidopsis thaliana*, in which the pollen apertures do not  
201 predetermine the pollen germination site (Edlund et al., 2004). To confirm the accumulation  
202 and timing of GEF8 and GEF9 compared to the evenly distributed GEF12, we simultaneously  
203 observed mCit-GEF8 or mCit-GEF12 coexpressed with mScarlet-GEF9 (mSct-GEF9). mCit-  
204 GEF8 and mSct-GEF9 both accumulated with a similar timing at the same location, confirming  
205 the observations in the single marker lines. However, mCit-GEF12 was still evenly diffused in  
206 the cytoplasm, with no significant accumulation when a clear accumulation of mSct-GEF9 was  
207 visible (Figure 1E and 1F). These results show differences between individual GEFs, as mCit-  
208 GEF11, mCit-GEF12, and mCit-GEF13 do not show specific localisations during pollen  
209 germination, while mCit-GEF8 and mCit-GEF9 specifically accumulate at the pollen

210 germination site. Moreover, mCit-GEF8 and mCit-GEF9 show a similar but distinct biphasic  
211 accumulation at the pollen germination site, with temporal differences between both proteins.  
212 Taken together, the differential localisation during pollen germination indicates a specific and  
213 subcellular localised role for GEF8 and GEF9 in initiating pollen germination.

214

### 215 **Distinct GEFs are required for pollen germination *in vitro***

216 In light of the specific accumulation of GEFs during pollen germination, we used loss-of-  
217 function mutant lines to investigate the function of GEFs in pollen germination. We used available  
218 T-DNA lines for *gef9-t1* (GK-717A10), *gef11-t1* (SALK\_126725), and *gef12-t1*  
219 (SALK\_103614), and generated CRISPR-Cas9 full-length deletion mutants, resulting in *gef8-*  
220 *cΔ1*, *gef8-cΔ2*, *gef9-cΔ1*, *gef12-cΔ1* single mutants, and double mutants *gef8-Δc1/gef12-Δc1*  
221 and *gef8c-Δ3/gef9-cΔ2* (Supplemental Figure S3). Col-0 was used as a wild-type reference  
222 and reached a pollen germination efficiency of 84 % 4 hours after imbibition on PGM (Figure  
223 2A-2B). *gef11-t1* (86 %) showed germination efficiencies similar to Col-0, while *gef9-t1* (79  
224 %), *gef12-t1* (70 %), and *gef12-cΔ1* (78 %) were slightly lower but not significantly different  
225 from Col-0. In comparison to *gef9-t1*, *gef9-cΔ1* (55 %) showed a significant reduction of pollen  
226 germination efficiency, indicating partial remaining GEF9 function in *gef9-t1*, which could be  
227 explained by the location of the T-DNA insertion in the fifth intron. We excluded the presence  
228 of full-length mRNA in *gef9-t1* by RT-PCR on flower cDNA and could only find partial *GEF9*  
229 mRNA in front and behind the T-DNA insertion site (Supplemental Figure S3). The germination  
230 efficiency of *gef8* CRISPR-Cas9 lines, *gef8-cΔ1* (63 %), and *gef8-cΔ2* (64 %) were  
231 comparable to *gef9-cΔ1* and were significantly different from Col-0. We were able to rescue  
232 *gef8-cΔ1* with the *GEF8p::mCit-GEF8* construct, which led to a germination efficiency of 83%,  
233 proving that the absence of GEF8 causes the phenotype and confirming the functionality of  
234 the mCit-fusion constructs (Figure 2A). The pollen germination was more severely reduced in  
235 *gef8-cΔ1;9-t1* (36 %) and *gef8-cΔ3;9-cΔ2* (50 %) double mutants, while *gef8-cΔ1;12-t1* (70  
236 %) and *gef9-t1;12-t1* (66 %) double mutants displayed no significant reduction of germination  
237 efficiency in comparison to the *gef8* and *gef9* single mutants. However, we still observed  
238 significant pollen germination in *gef8;gef9* double mutants. Therefore, we generated a *gef8-*  
239 *cΔ1;9-t1;12-t1* triple mutant. In this triple mutant line, *in vitro* pollen germination was almost  
240 completely abolished (0.2 %), showing that these three GEFs are essential for pollen  
241 germination (Figure 2A). In summary, this showed that GEF11 has no function in the pollen  
242 germination of *Arabidopsis thaliana*. GEF8 and GEF9 play a major role in pollen germination,  
243 as they both display a significant deficiency as single mutants, and this effect is amplified in  
244 the double mutant. The normal pollen germination efficiency of GEF12 single mutants shows  
245 a minor function of GEF12 in this process. However, because pollen germination was only

246 abolished in the combination of *gef8*, *gef9*, and *gef12*, a partial redundancy between these  
247 three GEFs can be assumed.

248

### 249 **GEF function is crucial for efficient male fertility *in vivo***

250 After we showed the necessity of GEFs for pollen germination *in vitro*, we assessed their role  
251 in pollination and male fertility *in vivo*. To determine the transmission efficiency of *gef* mutant  
252 alleles, we performed reciprocal crosses using Col-0 with *gef8*, *gef9*, and *gef12* mutant  
253 combination lines, in which one *gef* allele was heterozygous, leading to an expected  
254 transmission of 50 % for this *gef* allele in the F1 offspring (Figure 2C and Supplemental Figure  
255 S4). In the control direction with *gef* mutant lines as female, pollinated with Col-0 pollen, we  
256 did not find any significant reduction in the transmission of the mutant alleles, showing that  
257 *gef8*, *gef9*, and *gef12* are not required for female fertility (Supplemental Figure S4). When  
258 using *gef* mutant lines for pollination, we did not see significant reductions from the expected  
259 transmission in *gef8*, *gef9*, and *gef12* single and double mutant combinations. However, it  
260 needs to be mentioned that we observed nonsignificant reductions of the allele frequency in  
261 some *gef8/gef9* mutant allele combinations, which were not seen in other allele combinations  
262 of the same genes (Figure 2C and Supplemental Figure S4). Only the triple mutant *gef8-*  
263 *cΔ1;9-t1+/-;12-t1* had a reduced transmission of the *gef9-t1* allele (35 %), which significantly  
264 differed from the expected 50 % (p=0.0004) transmission (Figure 2C and Supplemental Figure  
265 S4). This effect on male fertility was lower than expected from the *in vitro* experiments but  
266 confirmed that *GEF8*, *GEF9* and *GEF12* are crucial for male fertility, likely by promoting  
267 efficient pollen germination.

268

### 269 **The C-terminal domain is necessary and sufficient for GEF8 and GEF9 accumulation**

270 We showed that GEF8 and GEF9 have distinct localisation compared to GEF11 and GEF12.  
271 To investigate which GEF proteins' components are responsible for this specificity, we  
272 analysed different domains of GEFs during pollen germination. GEFs consist of a conserved  
273 catalytic PRONE domain and variable N- and C-terminal regions. The existing crystal  
274 structures of the PRONE domain of GEF8, together with ROP4, showed that these proteins  
275 form a tetramer in which two GEFs dimerise, each having one ROP bound (Thomas et al.,  
276 2007). However, the terminal regions of GEF8 were not represented in this structure, as they  
277 are thought to be intrinsically disordered. Protein structure predictions of GEF8 and ROP1  
278 using AlphaFold2 and matched on the existing PRONE8-ROP4 structure (RCSB-PDB: 2NTY)  
279 with ChimeraX confirmed that these terminal regions are primarily unstructured, with only  
280 small helical elements (Thomas et al., 2007; Mirdita et al., 2022; Meng et al., 2023). However,  
281 in this predicted structure, both termini wrap around the protein, with the N-terminus blocking  
282 the binding site of the second GEF and the C-terminus blocking the binding site of the ROP

283 (Figure 3A). This structure could explain the inhibitory function of both termini that was  
284 described previously (Gu et al., 2006; Zhang and McCormick, 2007). We made several mutant  
285 and deletion constructs to understand the function of GEF8 and GEF9 during pollen  
286 germination and unravel the protein features responsible for their specific biphasic  
287 accumulation (Figure 3B and 3C). We started by deleting the variable N-terminus of GEF8  
288 (mCit-GEF8<sup>ΔN</sup>) and GEF9 (mCit-GEF9<sup>ΔN</sup>). The N-terminal deletion did not abolish the specific  
289 localisation of either protein, as we could still observe an accumulation at the germination site  
290 minutes before pollen tube emergence (Figure 3C Supplemental Video 4-5). Different effects  
291 were observed in constructs in which the variable C-terminal region of GEF8 (mCit-GEF8<sup>ΔC</sup>)  
292 and GEF9 (mCit-GEF9<sup>ΔC</sup>) was deleted. mCit-GEF8<sup>ΔC</sup> and mCit-GEF9<sup>ΔC</sup> were strictly cytosolic  
293 and showed no membrane attachment during pollen germination. (Figure 3C and  
294 Supplemental Video 6-7). This loss of accumulation of mCit-GEF8<sup>ΔC</sup> and mCit-GEF9<sup>ΔC</sup>  
295 showed that the GEF C-terminus is necessary for membrane attachment and the  
296 accumulation of GEF8 and GEF9 during pollen germination. Because the C-terminal domain  
297 is required for the accumulation of GEF8/GEF9 and this accumulation is not seen for mCit-  
298 GEF12 throughout the pollen germination process, we swapped the C-terminal domain of  
299 GEF12 with those of either GEF8 (mCit-GEF12<sup>GEF8C</sup>) or GEF9 (mCit-GEF12<sup>GEF9C</sup>) (Figure 3D  
300 and Supplemental Video 8-9). GEF12<sup>GEF8C</sup> and GEF12<sup>GEF9C</sup> both accumulated at the pollen  
301 germination site before pollen tube emergence, similar to the native mCit-GEF8 and mCit-  
302 GEF9, which was never observed for wild-type mCit-GEF12. This showed that the C-terminal  
303 domains of GEF8 and GEF9 are necessary for the polar accumulation of these proteins.  
304 Moreover, both C-termini are sufficient to recruit other GEFs to the cell periphery of the future  
305 pollen germination site.

306

### 307 **A phosphorylation site in the C-terminus of GEFs influences their accumulation**

308 To further understand the mechanism of GEF activation and localisation, we investigated the  
309 role of phosphorylation in GEF8 and GEF9 C-terminal domains. The C-terminus of GEFs was  
310 shown to be phosphorylated by RLKs at a serine of the conserved SPxxRH motif, leading to  
311 the activation of the PRONE domain (Kaothien et al., 2005; Zhang and McCormick, 2007;  
312 Cheung and Wu, 2008). The phosphorylation at this site was recently confirmed by proteomic  
313 approaches (Mergner et al., 2020). In the predicted structure, this phosphorylation site is  
314 accessible and could affect the blocking function of this domain (Figure 3E). To elucidate any  
315 potential functional effect of the phosphorylation of this serine on pollen germination, we  
316 mutated this serine to a phospho-dead (S518A) and potentially phospho-mimic (S518D)  
317 versions of GEF8 and transformed them into the *gef8-cΔ1* background. Both mutants,  
318 GEF8<sup>S518D</sup> and GEF8<sup>S518A</sup>, displayed no significant accumulation at the pollen tube  
319 germination site (Figure 3E and Supplemental Video 10-11). This indicates that the protein



320 accumulation is independent of the activity status of GEF8, but rather, the phosphorylation  
321 reaction by RLKs is critical for GEF accumulation. In summary, the deletion constructs of  
322 GEF8 and GEF9, in combination with the domain swap experiments, show that the C-terminal  
323 domain is necessary for the distinct accumulation of GEF8 and GEF9 and sufficient to transfer  
324 this function onto GEF12, which usually does not accumulate in this system. In addition,  
325 GEF8<sup>S518</sup> seems to have an essential role in GEF8 accumulation at the germination site,  
326 indicating that the activation by RLKs is a crucial factor in this process.

327

### 328 **GEF8 is necessary for ROP activation**

329 GEFs activate ROPs by exchanging GDP for GTP, leading to the recruitment of RIP or RIC  
330 proteins and the subsequent activation of downstream processes (Feiguelman et al., 2018).  
331 For example, RIC3 and RIC4 were shown to regulate pollen growth by mediating the  
332 modulation of Ca<sup>2+</sup> fluxes and F-actin formation (Theos et al., 2005). RICs contain a  
333 CDC42/RAC INTERACTIVE BINDING (CRIB) motif, which mediates the interaction with  
334 active GTP-bound ROPs. ROP1, ROP3, and ROP5 are specifically expressed in pollen grains.  
335 We observed mCit-ROP1, mCit-ROP3, and mCit-ROP5 under their endogenous promoters,  
336 and all three ROPs localised to the cytoplasm without any specific accumulation at the site of  
337 germination, as observed for mCit-GEF8 and mCit-GEF9 (Figure 4A and 4B and  
338 Supplemental Video 12-14). Nevertheless, as the CRIB domain is sufficient for active ROP  
339 binding, it allows the utilisation of the CRIB domain as a biosensor for the localisation of active  
340 ROPs (Luo et al., 2017). Here, we used the CRIB motif of RIC4 (CRIB4) fused to mCit under  
341 the control of the *GEF12* promoter fragment (*GEF12p::CRIB4-mCit*) as an indicator of ROP  
342 activity during pollen germination (Figure 4C and 4D). We observe a persistent CRIB4-mCit  
343 accumulation at the germination site during the germination process, which differs from the  
344 transient biphasic accumulation of mCit-GEF8 and mCit-GEF9 (Figure 4 and Supplemental  
345 Video 15). However, the timing of the initiation of CRIB4-mCit accumulation was similar to the  
346 one observed for both GEFs, approximately 10 minutes before germination. In addition, the  
347 overall width of the accumulation of CRIB4-mCit was similar to that of mCit-GEF8 and mCit-  
348 GEF9 (3-4  $\mu$ m). To show the causality between the accumulation of GEF8 and CRIB4, we  
349 investigated CRIB4-mCit localisation in a *gef8-cΔ1* background. In *gef8-cΔ1*, CRIB4-mCit  
350 accumulation was lost, and its localisation is cytoplasmic, with no apparent accumulation at  
351 the germination site during the pollen germination process (Figure 4C and Supplemental Video  
352 16). These results suggest that CRIB4 (a biosensor for active ROPs) accumulates at the  
353 germination site during the germination process, and this accumulation requires the activity of  
354 GEF8, which shows a functional link between GEF8/9 accumulation and ROP activation.

355

## 356 **GEF8 oscillation leads to changes in calcium oscillation**

357 ROP signalling leads to the activation of downstream pathways required for pollen tube  
358 growth, such as  $\text{Ca}^{2+}$  oscillations, which are essential for pollen tube growth and guidance  
359 (Cheung and Wu, 2008; Dresselhaus et al., 2016; Gao et al., 2016).  $\text{Ca}^{2+}$  undergoes fine-  
360 tuned oscillations and concentration variations to regulate polar growth (Iwano et al., 2009).  
361  $\text{Ca}^{2+}$  fluctuations are described during pollen germination *in vivo*, but their timing to other  
362 activators of pollen germination and their cause during pollen activation still need to be  
363 understood (Iwano et al., 2004). We used the  $\text{Ca}^{2+}$ -indicator RGeco1 under the control of the  
364 *Lat52* promoter to monitor  $\text{Ca}^{2+}$  oscillations during pollen germination in Col-0 (Figure 4E and  
365 Supplemental Video 17). Compared to the regular short oscillations during pollen tube growth,  
366 we observed longer and persisting  $\text{Ca}^{2+}$  elevations. We found a first increase of  $\text{Ca}^{2+}$  around -  
367 8 minutes before germination, which persisted with different intensities for multiple minutes,  
368 decreased shortly before germination and increased again at timepoint 0 (Figure 4E and 4F).  
369 This initial increase of  $\text{Ca}^{2+}$  was comparable to mCit-GEF8 and mCit-GEF9 accumulation,  
370 indicating a possible interaction between GEF8/9 and  $\text{Ca}^{2+}$  elevations. To investigate the  
371 association between GEF function and  $\text{Ca}^{2+}$  oscillation, we observed RGeco1 in *gef8-cΔ1*  
372 during pollen germination (Figure 4E and Supplemental Video 18). Interestingly, the  $\text{Ca}^{2+}$   
373 elevation pattern was not abolished but differed from the one observed in Col-0. Compared to  
374 Col-0, the RGeco1 signal did not increase in a persistent  $\text{Ca}^{2+}$  elevation in the *gef8-cΔ1* mutant  
375 but rather showed several lower intensity peaks throughout the germination process, with one  
376 stronger  $\text{Ca}^{2+}$  increase at the germination timepoint (Figure 4E and 4-F). This result further  
377 emphasises the necessity of GEF8 for ROP activation, resulting in normal  $\text{Ca}^{2+}$  elevations and  
378 pollen germination. In summary, the absence of GEF8 impacted CRIB4-mCit (active ROP  
379 biosensor) and  $\text{Ca}^{2+}$  oscillations, showing the crucial function of GEFs in activating ROP  
380 signalling leading to pollen germination.

381

## 382 **Discussion**

383 Pollen germination is a critical step in plant fertilisation, and characterising the underlying  
384 protein functions is crucial for understanding the activation of this process. Here, we identified  
385 specific ROPGEFs required for pollen germination and male fertility. These GEFs have distinct  
386 functions during pollen germination, which are conferred, in parts, by their C-terminal domain.  
387 Five of the 14 GEFs are expressed in mature Arabidopsis pollen (Supplemental Figure S1).  
388 We confirmed the presence of GEF8, GEF9, GEF11, and GEF12 using translational fusion  
389 lines but not GEF13 (Figure 1 and Supplemental Figure S2). As recent proteomics analysis  
390 only found very low amounts of GEF13 in mature pollen, it remains unclear whether GEF13 is  
391 irrelevant for pollen tube growth or is very specifically translated (Mergner et al., 2020).  
392 Previous results also indicated the presence of GEF1 and GEF14 during pollen tube growth,

393 but the detection of the expression level of these two genes was found to be low and  
394 inconsistent (Gu et al., 2006; Zhang and McCormick, 2007; Chang et al., 2013). In line with  
395 this, *GEF1* and *GEF14* were not identified in recent transcriptomics or proteomics data  
396 (Mergner et al., 2020).

397 The four consistently expressed GEFs have very distinct localisations, with GEF11 and GEF12  
398 evenly distributed in the cytoplasm throughout the germination process, while GEF8 and GEF9  
399 accumulated at the site of pollen germination before pollen tube growth (Figure 1 and  
400 Supplemental Figure S2). A similar accumulation of GEFs was described for GEF3 and  
401 GEF14 during root hair initiation (Denninger et al., 2019). However, during root hair initiation,  
402 the polar domain requires around 30 minutes to be established, is locally fixed and is persistent  
403 for hours (Denninger et al., 2019). The protein accumulations we observed for GEF8 and  
404 GEF9 were established significantly faster but shorter, as they only persisted at the pollen  
405 germination site for several minutes (Figure 1). An exciting aspect and a difference to the  
406 initiation of root hair growth is that the localisation of GEF8 and GEF9 accumulation was not  
407 fixed but could shift laterally during the initiation of pollen germination. This could be an  
408 essential feature of polar growth in pollen, as these cells need to adjust the germination site  
409 in response to contact with papilla cells. Thus, the flexibility of this growth machinery is  
410 required to initiate growth at the optimal position in species such as *Arabidopsis thaliana* with  
411 no predetermined germination site at the pollen apertures (Edlund et al., 2004). We also found  
412 differences in the timing of protein accumulation between GEF8 and GEF9, leading to a  
413 constant presence of GEF8 or GEF9 at the pollen germination site but with different ratios to  
414 each other (Figure 1). It remains to be determined whether they have redundant functions at  
415 this location or if distinct pathways are activated by these particular proteins, as described for  
416 downstream RIC proteins (Gu et al., 2005).

417 The *gef8* and *gef9* single mutants had significantly reduced pollen germination efficiencies,  
418 while *gef11* and *gef12* single mutants did not display significant reductions in pollen  
419 germination (Figure 2 and Supplemental Figure S3). Compared to the previously postulated  
420 redundancy of GEFs during pollen germination and growth, our results suggest, at least during  
421 pollen germination, that individual GEFs have distinct localisations and non-redundant  
422 functions (Chang et al., 2013; Zhou et al., 2023). The availability of suitable mutant lines can  
423 explain the discrepancy with the previous reports, which did not detect the same defects, as  
424 the observed phenotypes of *gef8* and *gef9* mutants were only evident in the CRISPR-Cas9  
425 deletion mutants generated in this study (Figure 2 and Supplemental Figure S3). The only  
426 available T-DNA line for *GEF8* had multiple T-DNA integrations and, in our experience,  
427 showed developmental defects independent of the integration in *GEF8*. The available T-DNA  
428 line of *GEF9* showed a mild and less consistent phenotype than the generated CRISPR-Cas9  
429 deletion mutant (Figure 2 and Supplemental Figure S3). In combination with the presented

430 localisation data, our phenotyping analysis shows that not all GEFs act redundantly during  
431 pollen germination. We suggest that these GEFs activate different aspects required for polar  
432 growth to another degree. Thus, all GEFs are distinctively required for efficient pollen  
433 germination and male fertility, which only leads to a severe phenotype in higher-order mutants  
434 (Figure 2), similar to the observations made in loss-of-function mutants of all pollen-expressed  
435 *ROPs* (Xiang et al., 2023). Additionally, the severity of the *gef8-cΔ1;9-t1;12-t1* triple mutant  
436 phenotype observed *in vitro* can be overcome *in vivo*, as the *gef8-cΔ1;9-t1;12-t1* triple mutant,  
437 which hardly showed pollen germination on PGM, still had a significant transmission in  
438 reciprocal crosses (Figure 2C and Supplemental Figure S4), which is similar to recent data  
439 shown in *gef8;9;11;12;13* quintuple mutants. Potentially, other GEFs might have a higher  
440 activity *in vivo* that could rescue the lack of these primary GEFs, leading to a weaker  
441 phenotype than the total loss of ROP activity (Xiang et al., 2023).

442 The distinct localisations we observed for GEF8 and GEF9 indicate that a specific feature of  
443 those proteins transmits this function. As the PRONE domain of all GEFs is conserved, we  
444 focused on the variable termini with no apparent structure and seeming intrinsically disordered  
445 (Figure 3) (Berken et al., 2005). The predicted full-length structure of GEF8 suggests that both  
446 termini are folding around the PRONE domain to either block ROP binding or prevent protein  
447 dimerisation, indicating inhibitory functions. However, the confidence in the structure of these  
448 regions is very low, and it remains unclear how these termini are folded or if they can take  
449 different shapes depending on the situation. The N-terminus was shown to have activating  
450 functions for GEF activity, while the C-terminus inhibits PRONE activity (Gu et al., 2006; Zhang  
451 and McCormick, 2007). However, in contrast to the suggested function of the terminal domains  
452 for GEF activity, we observed other functions for their localisation. The deletion of the N-  
453 terminus did not significantly alter protein accumulation behaviour. In contrast, the deletion of  
454 the C-terminus abolished protein accumulation (Figure 3C), which shows that the contribution  
455 of the termini to protein activity and localisation independently regulates different aspects of  
456 GEFs. We speculate that the C-terminus of GEF8 and GEF9 is required for interaction with  
457 RLKs like PRKs, as shown before for GEF12, as mutations in the conserved phosphorylation  
458 site can alter this accumulation (Figure 3) (Kaothien et al., 2005; Chang et al., 2013). However,  
459 this interaction must be specific to GEF8 and GEF9 as we do not see such accumulations for  
460 other GEFs. Moreover, the ability for protein accumulation before pollen tube emergence can  
461 be transferred onto GEF12 when exchanging the C-terminal domain (Figure 3D). Suggesting  
462 that other scaffolding proteins or other RLKs than the previously reported PRK2, PRK6, or  
463 BUPS are responsible for this interaction, as they also interact with GEF12 (Chang et al.,  
464 2013; Zhao et al., 2013; Takeuchi and Higashiyama, 2016; Yu et al., 2018; Zhou et al., 2021).  
465 However, it is also possible that additional mechanisms are crucial for this accumulation or  
466 that further factors transmit a specific interaction of GEF8 and GEF9 with the known RLKs at

467 this particular time during the initiation of pollen germination. Other proteins known to show  
468 similar accumulation at the pollen germination site before germination are the ROP effector  
469 scaffold proteins RIP1, RIC1, and potentially other members of these families or BOUNDARY  
470 OF ROP DOMAIN (BDR) proteins. However, it is unlikely that these scaffolds drive GEF  
471 accumulation, as they are ROP effectors, and their accumulation depends on ROP activation  
472 (Li et al., 2008; Zhou et al., 2015; Sugiyama et al., 2019; Xiang et al., 2023). Still, these  
473 effectors may have a role in stabilising the GEF accumulation in a feedback loop to confine  
474 the domain, as shown in root hairs (Denninger et al., 2019).

475 The accumulation of GEFs did not lead to any significant accumulation of ROPs at the pollen  
476 germination site (Figure 4A), which conforms with recent observations of ROPs during pollen  
477 germination (Xiang et al., 2023). Still, we could observe that a marker for active ROPs and  
478  $Ca^{2+}$  signals are elevated at the pollen germination site with a timing similar to the observed  
479 GEF accumulations. In line with this, the accumulation of the active ROP marker was lost, and  
480 the  $Ca^{2+}$  elevation pattern was altered in the *gef8-cΔ1* mutant (Figure 4C and 4D). The  
481 complete loss of accumulation of the ROP activity indicator (CRIB domain) is surprising,  
482 considering the mild phenotype in *gef8-cΔ* mutants (Figure 2). However, the accumulation of  
483 this indicator is also very low, and it might be that slight changes in ROP activity already have  
484 significant effects on this sensor, even though the remaining ROP activity is sufficient to trigger  
485 altered  $Ca^{2+}$  signals and induce pollen germination. However, this alteration of ROP activity in  
486 *gef* mutants indicates that GEF accumulation is upstream of ROP activity and requires a  
487 different mechanism. A connection to phospholipid signalling is possible, as shown in root  
488 cells (Platre et al., 2019). Candidate proteins are PHOSPHATIDYLINOSITOL 4-PHOSPHATE  
489 5-KINASES (PIP4Ks) that regulate phospholipid abundance and regulate tip growth in pollen  
490 tubes and root hair cells (Kusano et al., 2008; Kato et al., 2024). PIP4Ks also accumulate at  
491 the pollen germination site and might act together with GEFs to drive ROP signalling, but  
492 results in root hairs suggest that PIP4K accumulation is downstream of GEF accumulation  
493 (Denninger et al., 2019; Kato et al., 2024). Still, studying the connection to other pathways and  
494 their regulatory connection will be a challenging task to fully understand polarity establishment  
495 and polar growth initiation.

496 We show that specific GEFs are required for efficient pollen germination and that GEF8 and  
497 GEF9 display distinct localisations compared to GEF11 and GEF12. Together, this shows that  
498 GEFs are not redundant during pollen germination and can have specific functions within the  
499 same process in one cell. The novel polar domain of accumulated GEF8/9 protein in  
500 germinating pollen tubes was spatiotemporally flexible and not static as in previously  
501 described processes. We hypothesise that this flexibility is crucial to define the pollen  
502 germination site independently of predeterminant features and shows the *de novo* assembly  
503 of a polar growth domain.



504 **Material and Methods**

505

506 **Plant material and growth conditions:**

507 *Arabidopsis thaliana* plants were grown on soil under long-day conditions (16 h of light at 21 C)  
508 in a growth chamber. *Arabidopsis thaliana* ecotype Col-0 was used as a wild-type reference.

509 The mutant lines *gef9-t1* (GK-717A10), *gef11-t1* (SALK\_126725C), and *gef12-t1*  
510 (SALK\_103614) were obtained from NASC (Nottingham Arabidopsis Stock Centre). Single  
511 t-DNA insertion was confirmed by segregation analysis, and the t-DNA insertion site was  
512 checked by sequencing the genotyping PCR product on both sides of the insertion site.  
513 Primers used for genotyping are listed in Supplemental Table S1. Double and triple mutants  
514 were made by crossing these lines and were selected by PCR. Fluorescently labelled  
515 *GEF12p::mCit-GEF12* was used from (Denninger et al., 2019).

516

517 **CRISPR/Cas9 deletion lines:**

518 To generate *gef8-cΔ1* and *gef12-cΔ1* CRISPR/Cas9 deletion lines, we used an egg cell-  
519 specific promoter-driven CRISPR/Cas9 (Wang et al., 2015). We used two gRNAs, one in 5'  
520 and the other in 3' of the gene, cloned in tandem into one vector (Supplemental Figure S3).  
521 The selection of positive transformants in T1 generation was done on ½ MS medium  
522 containing Hygromycin (20 µg/ml).

523 To generate CRISPR/Cas9 deletion lines for *gef8-cΔ2* (2.2kb) and *gef9-cΔ1* (2.7kb) single  
524 mutants and *gef8c-Δ3/gef9-cΔ2* double mutants, we used a multiplex editing approach based  
525 on an optimised zCas9i (Stuttman et al., 2021). We used four gRNAs per gene, two in 5' and  
526 two in 3' of the gene. (Supplemental Figure S3). The selection of positive lines in T1 was  
527 performed using seed fluorescence and Basta resistance. T2 selection was made by selecting  
528 non-glowing seeds.gRNAs were determined using ChopChop (<https://chopchop.cbu.uib.no/>)  
529 (Labun et al., 2019) and CCTop (<https://cctop.cos.uni-heidelberg.de/>) (Stemmer et al., 2015)  
530 and successful cloning was confirmed by sequencing. Genotyping was performed by primers  
531 200-300bp outside the deleted area. The characterisation of the deletion was done by  
532 sequencing the resulting PCR product. Confirmation of homozygous mutant alleles was done  
533 by combination with a primer binding in the deleted region and was confirmed in the following  
534 generation. All primers are listed in Supplemental Table S1.

535

536 **Plasmid construct:**

537 All non-CRISPR/Cas9 constructs were generated using the GreenGate cloning system  
538 (Lamproulos et al., 2013) with modified cloning procedures. A list of combined modules and  
539 their sources is provided in Supplemental Table S2. As native promoter sequences upstream  
540 regions of the START codon, including the 5'UTRs, were cloned for *GEF8* (AT3G24620, -

541 2501bp), *GEF9* (AT4G13240, -1463bp), *GEF11* (AT1G52240, -973bp), *GEF12* (AT1G79860,  
542 701bp), and *GEF13* (AT3G16130, 850bp and 1200pb) The *LAT52* promoter was amplified  
543 from LHR lines (Denninger et al., 2014) and a RGeco1 module was kindly provided by Rainer  
544 Waadt (Waadt et al., 2017) The CRIB4 module was generated by amplification of the CRIB  
545 domain of RIC4 (AT5G16490, amino acid I64-I131) as described before (Luo et al., 2017) from  
546 flower cDNA. All primers used to generate new Entry-Vector modules are listed in  
547 Supplemental Table S1. The correct amplification and cloning of entry-vector modules were  
548 confirmed by sequencing. We generated a new GreenGate-compatible destination vector to  
549 achieve a higher plant transformation efficiency. For this, we amplified the vector backbone of  
550 pHEE401E (Wang et al., 2015) and the GreenGate cloning cassette of pGGZ003  
551 (Lampropoulos et al., 2013) by PCR (Primers in Supplemental Table S1) and combined both  
552 fragments using added MluI and BamHI sites. The resulting plasmid was confirmed by  
553 sequencing and named pGGX000.

554

#### 555 **Phenotyping of pollen germination efficiency:**

556 For phenotyping of *in vitro* pollen germination efficiency, pollen of freshly opened flowers was  
557 germinated at 22°C on solid pollen germination medium (PGM), containing 1.5% agarose  
558 (w/v), 18% sucrose (w/v), 0.01% boric acid (w/v), 1mM CaCl<sub>2</sub>, 1mM Ca(NO<sub>3</sub>)<sub>2</sub>, 1mM MgSO<sub>4</sub>,  
559 10µM 24-epibrassinolides (MedChemExpress, HY-N084824, dissolved to 5mM in Ethanol),  
560 and adjusted to pH=7.0 using 100 mM KOH,) (Vogler *et al.*, 2014). Germination was analysed  
561 4 hours after imbibition on the PGM, using a Leica MZ16 stereomicroscope equipped with  
562 DMC5400. The images were analysed using the multipoint tool of ImageJ  
563 (<https://imagej.nih.gov/ij/docs/guide/146-19.html#sec:Multi-point-Tool>), then making the ratio  
564 of germinated and ungerminated pollen to get the germination efficiency. Each line was  
565 analysed in at least three independent experiments, including three replicates in each  
566 experiment. Each data point represents an independent replicate analysing more than 150  
567 pollen grains. Statistical analysis was performed using GraphPad Prism 9. We used a one-  
568 way ANOVA with a post-Tukey test (significance level <0.0001) to test for significant  
569 differences in pollen germination efficiency.

570

#### 571 **Fluorescence imaging and quantification:**

572 Imaging of *in vitro* pollen germination was done at 22°C on solid PGM, containing 1.5%  
573 agarose (w/v), 10% sucrose (w/v), 0.01% boric acid (w/v), 5mM CaCl<sub>2</sub>, 5mM KCl, 1mM MgSO<sub>4</sub>,  
574 adjusted to pH=7.5 using 100 mM KOH (Boavida and McCormick, 2007) and supplemented  
575 with 10µM 24-epibrassinolides (MedChemExpress, HY-N084824, dissolved to 5mM in  
576 Ethanol) (Vogler et al., 2014).

577 Live cell imaging was performed using an Olympus confocal FV-1000 equipped with a 40x  
578 water immersion (1.15 NA) objective, an Argon laser, and a 559 nm diode laser. Signals were  
579 detected with high-sensitivity detectors. mCitrine (YFP) was excited at 515 nm and detected  
580 between 520-550nm. mScarlet (RFP) and RGeco signals were excited at 559 nm and were  
581 detected between 580-653 nm. The pinhole was set to 1AU, and images were taken with a 2x  
582 line average in a 1024x1024 pixel scanning field. The same settings were applied to all  
583 images, and the excitation laser intensity was set to a minimum for the individual lines to avoid  
584 phototoxicity. GEF live pollen germination images were acquired every 30 seconds for 30  
585 minutes. For Lat52p::RGeco, images were acquired every 5 seconds for 30 minutes. The  
586 images were processed and analysed using ImageJ. Kymographs were generated with the  
587 MultipleKymograph plugin, using a line width of five pixels.

588

589

590

### 591 **Acknowledgements**

592 We are grateful to Andrea Bleckmann, Claus Schwechheimer (Technical University of  
593 Munich), and Guido Grossmann (University Düsseldorf) for helpful comments and suggestions  
594 on our manuscript. We thank Thomas Dresselhaus (University Regensburg) for the possibility  
595 of confirming our results on an independent microscope setup and Andrea Bleckmann for  
596 imaging advice and microscope instructions. We thank all members of the Schwechheimer  
597 group for their support, especially Franziska Anzenberger, for her dedication and support of  
598 our plant work and experimental procedures. The Deutsche Forschungsgemeinschaft  
599 supported this work within the Collaborative Research Centre SFB924/3 (#170483403) #A15.

600

601

### 602 **Author contributions**

603 P.D. conceived the study; A.M.B. and P.D. performed experiments, analysed data, prepared  
604 figures, and wrote the manuscript with input from A.L.; A.M.B., A.L. and P.D. generated  
605 experimental material; All authors read and approved the final version of the manuscript.

606

607

608 **References**

- 609 **Berken A, Thomas C, Wittinghofer A** (2005) A new family of RhoGEFs activates the Rop  
610 molecular switch in plants. *Nature* **436**: 1176–1180
- 611 **Berken A, Wittinghofer A** (2008) Structure and function of Rho-type molecular switches in  
612 plants. *Plant Physiol Biochem* **46**: 380–393
- 613 **Bleckmann A, Alter S, Dresselhaus T** (2014) The beginning of a seed: regulatory  
614 mechanisms of double fertilization. *Front Plant Sci* **5**: 452
- 615 **Boavida LC, McCormick S** (2007) Temperature as a determinant factor for increased and  
616 reproducible in vitro pollen germination in *Arabidopsis thaliana*. *Plant J* **52**: 570–582
- 617 **Boisson-Dernier A, Roy S, Kritsas K, Grobei MA, Jaciubek M, Schroeder JI,  
618 Grossniklaus U** (2009) Disruption of the pollen-expressed FERONIA homologs ANXUR1  
619 and ANXUR2 triggers pollen tube discharge. *Development* **136**: 3279–3288
- 620 **Bos JL, Rehmann H, Wittinghofer A** (2007) GEFs and GAPs: Critical Elements in the  
621 Control of Small G Proteins (DOI:10.1016/j.cell.2007.05.018). *Cell* **130**: 385
- 622 **Chang F, Gu Y, Ma H, Yang Z** (2013) AtPRK2 Promotes ROP1 Activation via RopGEFs in  
623 the Control of Polarized Pollen Tube Growth. *Mol Plant* **6**: 1187–1201
- 624 **Cheung AY, Wu HM** (2008) Structural and signaling networks for the polar cell growth  
625 machinery in pollen tubes. *Annu Rev Plant Biol* **59**: 547–572
- 626 **Denninger P, Bleckmann A, Lausser A, Vogler F, Ott T, Ehrhardt DW, Frommer WB,  
627 Sprunck S, Dresselhaus T, Grossmann G** (2014) Male–female communication triggers  
628 calcium signatures during fertilization in *Arabidopsis*. *Nat Commun* **5**: 4645
- 629 **Denninger P, Reichelt A, Schmidt VAF, Mehlhorn DG, Asseck LY, Stanley CE, Keinath  
630 NF, Evers J-F, Grefen C, Grossmann G** (2019) Distinct RopGEFs Successively Drive  
631 Polarization and Outgrowth of Root Hairs. *Curr Biol* **29**: 1854-1865.e5
- 632 **Dresselhaus T, Franklin-Tong N** (2013) Male-female crosstalk during pollen germination,  
633 tube growth and guidance, and double fertilization. *Mol Plant* **6**: 1018–1036
- 634 **Dresselhaus T, Sprunck S, Wessel GM** (2016) Fertilization mechanisms in flowering plants.  
635 *Curr Biol* **26**: R125–R139
- 636 **Duan Q, Kita D, Li C, Cheung AY, Wu H-M** (2010) FERONIA receptor-like kinase regulates  
637 RHO GTPase signaling of root hair development. *Proc Natl Acad Sci* **107**: 17821–17826
- 638 **Edlund AF, Swanson R, Preuss D** (2004) Pollen and stigma structure and function: the role  
639 of diversity in pollination. *Plant Cell* **16 Suppl**: S84-97
- 640 **Feiguelman G, Fu Y, Yalovsky S** (2018) ROP GTPases Structure-Function and Signaling  
641 Pathways. *Plant Physiol* **176**: 57–79
- 642 **Gao QF, Gu LL, Wang HQ, Fei CF, Fang X, Hussain J, Sun SJ, Dong JY, Liu H, Wang YF**  
643 (2016) Cyclic nucleotide-gated channel 18 is an essential Ca<sup>2+</sup> channel in pollen tube tips  
644 for pollen tube guidance to ovules in *Arabidopsis*. *Proc Natl Acad Sci U S A* **113**: 3096–  
645 3101
- 646 **Ge Z, Bergonci T, Zhao Y, Zou Y, Du S, Liu M-C, Luo X, Ruan H, García-Valencia LE,  
647 Zhong S, et al** (2017) *Arabidopsis* pollen tube integrity and sperm release are regulated  
648 by RALF-mediated signaling. *Science* **358**: 1596–1600
- 649 **Gu Y, Fu Y, Dowd P, Li S, Vernoud V, Gilroy S, Yang Z** (2005) A Rho family GTPase  
650 controls actin dynamics and tip growth via two counteracting downstream pathways in  
651 pollen tubes. *J Cell Biol* **169**: 127–138
- 652 **Gu Y, Li S, Lord EM, Yang Z** (2006) Members of a Novel Class of *Arabidopsis* Rho Guanine  
653 Nucleotide Exchange Factors Control Rho GTPase-Dependent Polar Growth. *Plant Cell*  
654 **18**: 366–381
- 655 **Hamamura Y, Nishimaki M, Takeuchi H, Geitmann A, Kurihara D, Higashiyama T** (2014)  
656 Live imaging of calcium spikes during double fertilization in *Arabidopsis*. *Nat Commun* **5**:  
657 4722

- 658 **Holdaway-Clarke TL, Hepler PK** (2003) Control of pollen tube growth: role of ion gradients  
659 and fluxes. *New Phytol* **159**: 539–563
- 660 **Iwano M, Entani T, Shiba H, Kakita M, Nagai T, Mizuno H, Miyawaki A, Shoji T, Kubo K,**  
661 **Isogai A, et al** (2009) Fine-tuning of the cytoplasmic Ca<sup>2+</sup> concentration is essential for  
662 pollen tube growth. *Plant Physiol* **150**: 1322–1334
- 663 **Iwano M, Shiba H, Miwa T, Che F-S, Takayama S, Nagai T, Miyawaki A, Isogai A** (2004)  
664 Ca<sup>2+</sup> Dynamics in a Pollen Grain and Papilla Cell during Pollination of Arabidopsis. *Plant*  
665 *Physiol* **136**: 3562–3571
- 666 **Kaothien P, Ok SH, Shuai B, Wengier D, Cotter R, Kelley D, Kiriakopolos S, Muschiatti**  
667 **J, McCormick S** (2005) Kinase partner protein interacts with the LePRK1 and LePRK2  
668 receptor kinases and plays a role in polarized pollen tube growth. *Plant J* **42**: 492–503
- 669 **Kato M, Watari M, Tsuge T, Zhong S, Gu H, Qu L, Fujiwara T, Aoyama T** (2024) Redundant  
670 function of the Arabidopsis phosphatidylinositol 4-phosphate 5-kinase genes PIP5K4–6 is  
671 essential for pollen germination. *Plant J* **117**: 212–225
- 672 **Kost B, Lemichez E, Spielhofer P, Hong Y, Toliaas K, Carpenter C, Chua N-H** (1999a) Rac  
673 Homologues and Compartmentalized Phosphatidylinositol 4, 5-Bisphosphate Act in a  
674 Common Pathway to Regulate Polar Pollen Tube Growth. *J Cell Biol* **145**: 317–330
- 675 **Kost B, Lemichez E, Spielhofer P, Hong Y, Toliaas K, Carpenter C, Chua N** (1999b) Tube  
676 Growth. *J Cell Biol* **145**: 317–330
- 677 **Kusano H, Testerink C, Vermeer JEM, Tsuge T, Shimada H, Oka A, Munnik T, Aoyama**  
678 **T** (2008) The Arabidopsis Phosphatidylinositol Phosphate 5-Kinase PIP5K3 Is a Key  
679 Regulator of Root Hair Tip Growth. *Plant Cell* **20**: 367–380
- 680 **Labun K, Montague TG, Krause M, Torres Cleuren YN, Tjeldnes H, Valen E** (2019)  
681 CHOPCHOP v3: Expanding the CRISPR web toolbox beyond genome editing. *Nucleic*  
682 *Acids Res* **47**: W171–W174
- 683 **Lampropoulos A, Sutikovic Z, Wenzl C, Maegele I, Lohmann JU, Forner J** (2013)  
684 GreenGate - A novel, versatile, and efficient cloning system for plant transgenesis. *PLoS*  
685 *One* **8**: e83043
- 686 **Li E, Cui Y, Ge F-RR, Chai S, Zhang W-TT, Feng Q-NN, Jiang L, Li S, Zhang Y** (2018)  
687 AGC1.5 Kinase Phosphorylates RopGEFs to Control Pollen Tube Growth. *Mol Plant* **11**:  
688 1198–1209
- 689 **Li E, Zhang YY-L, Shi X, Li H, Yuan X, Li S, Zhang YY-L** (2020) A positive feedback circuit  
690 for ROP-mediated polar growth. *Mol Plant* **14**: 108947
- 691 **Li S, Gu Y, Yan A, Lord E, Yang ZB** (2008) RIP1 (ROP Interactive Partner 1)/ICR1 marks  
692 pollen germination sites and may act in the ROP1 pathway in the control of polarized pollen  
693 growth. *Mol Plant* **1**: 1021–1035
- 694 **Lin D, Nagawa S, Chen J, Cao L, Chen X, Xu T, Li H, Dhonukshe P, Yamamuro C, Friml**  
695 **J, et al** (2012) A ROP GTPase-Dependent Auxin Signaling Pathway Regulates the  
696 Subcellular Distribution of PIN2 in Arabidopsis Roots. *Curr Biol* **22**: 1319–1325
- 697 **Lin W, Tang W, Pan X, Huang A, Gao X, Anderson CT, Yang Z** (2022) Arabidopsis  
698 pavement cell morphogenesis requires FERONIA binding to pectin for activation of ROP  
699 GTPase signaling. *Curr Biol* **32**: 497-507.e4
- 700 **Lin Y, Wang Y, Zhu J, Yang Z** (1996) Localization of a Rho GTPase Implies a Role in Tip  
701 Growth and Movement of the Generative Cell in Pollen Tubes. *Plant Cell* **8**: 293
- 702 **Liu C, Shen L, Xiao Y, Vyshedsky D, Peng C, Sun X, Liu Z, Cheng L, Zhang H, Han Z, et**  
703 **al** (2021) Pollen PCP-B peptides unlock a stigma peptide–receptor kinase gating  
704 mechanism for pollination. *Science* **372**: 171–175
- 705 **Luo N, Yan A, Liu G, Guo J, Rong D, Kanaoka MM, Xiao Z, Xu G, Higashiyama T, Cui X,**  
706 **et al** (2017) Exocytosis-coordinated mechanisms for tip growth underlie pollen tube growth  
707 guidance. *Nat Commun* **8**: 1687



- 708 **Meng EC, Goddard TD, Pettersen EF, Couch GS, Pearson ZJ, Morris JH, Ferrin TE** (2023)  
709 UCSF ChimeraX: Tools for structure building and analysis. *Protein Sci* **32**: e4792
- 710 **Mergner J, Frejno M, List M, Papacek M, Chen X, Chaudhary A, Samaras P, Richter S,**  
711 **Shikata H, Messerer M, et al** (2020) Mass-spectrometry-based draft of the Arabidopsis  
712 proteome. *Nature* **579**: 409–414
- 713 **Mirdita M, Schütze K, Moriwaki Y, Heo L, Ovchinnikov S, Steinegger M** (2022) ColabFold:  
714 making protein folding accessible to all. *Nat Methods* **19**: 679–682
- 715 **Miyawaki KN, Yang Z** (2014) Extracellular signals and receptor-like kinases regulating ROP  
716 GTPases in plants. *Front Plant Sci* **5**: 449
- 717 **Miyazaki S, Murata T, Sakurai-Ozato N, Kubo M, Demura T, Fukuda H, Hasebe M** (2009)  
718 ANXUR1 and 2, sister genes to FERONIA/SIRENE, are male factors for coordinated  
719 fertilization. *Curr Biol* **19**: 1327–1331
- 720 **Mu JH, Lee HS, Kao TH** (1994) Characterization of a pollen-expressed receptor-like kinase  
721 gene of *Petunia inflata* and the activity of its encoded kinase. *Plant Cell* **6**: 709–721
- 722 **Muschietti J, Eyal Y, McCormick S** (1998) Pollen Tube Localization Implies a Role in Pollen–  
723 Pistil Interactions for the Tomato Receptor-like Protein Kinases LePRK1 and LePRK2.  
724 *Plant Cell* **10**: 319–330
- 725 **Nagashima Y, Tsugawa S, Mochizuki A, Sasaki T, Fukuda H, Oda Y** (2018) A Rho-based  
726 reaction-diffusion system governs cell wall patterning in metaxylem vessels. *Sci Rep* **8**:  
727 11542
- 728 **Nagawa S, Xu T, Yang Z** (2010) RHO GTPase in plants. *Small GTPases* **1**: 78–88
- 729 **Platre MP, Bayle V, Armengot L, Bareille J, Marquès-Bueno MDM, Creff A, Maneta-**  
730 **Peyret L, Fiche J-B, Nollmann M, Miège C, et al** (2019) Developmental control of plant  
731 Rho GTPase nano-organization by the lipid phosphatidylserine. *Science* **364**: 57–62
- 732 **Roszak P, Heo J, Blob B, Toyokura K, Sugiyama Y, de Luis Balaguer MA, Lau WWY,**  
733 **Hamey F, Cirrone J, Madej E, et al** (2021) Cell-by-cell dissection of phloem development  
734 links a maturation gradient to cell specialization. *Science* **374**: eaba5531
- 735 **Rudall PJ, Bateman RM** (2007) Developmental bases for key innovations in the seed-plant  
736 microgametophyte. *Trends Plant Sci* **12**: 317–326
- 737 **Shichrur K, Yalovsky S** (2006) Turning ON the switch - RhoGEFs in plants. *Trends Plant Sci*  
738 **11**: 57–59
- 739 **Sprunck S** (2020) Twice the fun, double the trouble: gamete interactions in flowering plants.  
740 *Curr Opin Plant Biol* **53**: 106–116
- 741 **Steinhorst L, Kudla J** (2013) Calcium - a central regulator of pollen germination and tube  
742 growth. *Biochim Biophys Acta - Mol Cell Res* **1833**: 1573–1581
- 743 **Stemmer M, Thumberger T, Del Sol Keyer M, Wittbrodt J, Mateo JL** (2015) CCTop: An  
744 intuitive, flexible and reliable CRISPR/Cas9 target prediction tool. *PLoS One* **10**: 1–11
- 745 **Stuttman J, Barthel K, Martin P, Ordon J, Erickson JL, Herr R, Ferik F, Kretschmer C,**  
746 **Berner T, Keilwagen J, et al** (2021) Highly efficient multiplex editing: one-shot generation  
747 of 8× *Nicotiana benthamiana* and 12× *Arabidopsis* mutants. *Plant J* **106**: 8–22
- 748 **Sugiyama Y, Nagashima Y, Wakazaki M, Sato M, Toyooka K, Fukuda H, Oda Y** (2019) A  
749 Rho-actin signaling pathway shapes cell wall boundaries in *Arabidopsis* xylem vessels. *Nat*  
750 *Commun* **10**: 1–7
- 751 **Takeuchi H, Higashiyama T** (2016) Tip-localized receptors control pollen tube growth and  
752 LURE sensing in *Arabidopsis*. *Nature* **531**: 245–8
- 753 **Tang W, Kelley D, Ezcurra I, Cotter R, McCormick S** (2004) LeSTIG1, an extracellular  
754 binding partner for the pollen receptor kinases LePRK1 and LePRK2, promotes pollen tube  
755 growth in vitro. *Plant J* **39**: 343–353
- 756
- 757

- 758 **Theos AC, Martina A, Hurbain I, Peden AA, Sviderskaya E V, Stewart A, Robinson MS,**  
759 **Bennett DC, Cutler DF, Bonifacino JS, et al** (2005) Functions of adaptor protein (AP)-3  
760 and AP-1 in tyrosinase sorting from endosomes to melanosomes. *Mol Biol Cell* **16**: 5356–  
761 5372
- 762 **Thomas C, Fricke I, Scrima A, Berken A, Wittinghofer A** (2007) Structural Evidence for a  
763 Common Intermediate in Small G Protein-GEF Reactions. *Mol Cell* **25**: 141–149
- 764 **Vogler F, Schmalzl C, Enghart M, Bircheneder M, Sprunck S** (2014) Brassinosteroids  
765 promote Arabidopsis pollen germination and growth. *Plant Reprod* **27**: 153–167
- 766 **Waadt R, Krebs M, Kudla J, Schumacher K** (2017) Multiparameter imaging of calcium and  
767 abscisic acid and high-resolution quantitative calcium measurements using R-GECO1-  
768 mTurquoise in Arabidopsis. *New Phytol* **216**: 303–320
- 769 **Wang ZP, Xing HL, Dong L, Zhang HY, Han CY, Wang XC, Chen QJ** (2015) Egg cell-  
770 specific promoter-controlled CRISPR/Cas9 efficiently generates homozygous mutants for  
771 multiple target genes in Arabidopsis in a single generation. *Genome Biol* **16**: 1–12
- 772 **Xiang X, Zhang S, Li E, Shi X-L, Zhi J-Y, Liang X, Yin G-M, Qin Z, Li S, Zhang Y** (2023)  
773 RHO OF PLANT proteins are essential for pollen germination in Arabidopsis. *Plant Physiol*  
774 0–2
- 775 **Yu F, Qian L, Nibau C, Duan Q, Kita D, Levasseur K, Li X, Lu C, Li H, Hou C, et al** (2012)  
776 FERONIA receptor kinase pathway suppresses abscisic acid signaling in Arabidopsis by  
777 activating ABI2 phosphatase. *Proc Natl Acad Sci* **109**: 14693–14698
- 778 **Yu Y, Song J, Tian X, Zhang H, Li L, Zhu H** (2018) Arabidopsis PRK6 interacts specifically  
779 with AtRopGEF8/12 and induces depolarized growth of pollen tubes when overexpressed.  
780 *Sci China Life Sci* **61**: 100–112
- 781 **Zhang C, Kotchoni SO, Samuels AL, Szymanski DB** (2010) SPIKE1 signals originate from  
782 and assemble specialized domains of the endoplasmic reticulum. *Curr Biol* **20**: 2144–2149
- 783 **Zhang Y, McCormick S** (2007) A distinct mechanism regulating a pollen-specific guanine  
784 nucleotide exchange factor for the small GTPase Rop in Arabidopsis thaliana. *Proc Natl*  
785 *Acad Sci* **104**: 18830–18835
- 786 **Zhao X-Y, Wang Q, Li S, Ge F-R, Zhou L-Z, McCormick S, Zhang Y** (2013) The  
787 juxtamembrane and carboxy-terminal domains of Arabidopsis PRK2 are critical for ROP-  
788 induced growth in pollen tubes. *J Exp Bot* **64**: 5599–5610
- 789 **Zhou X, Han W, Dai J, Liu S, Gao S, Guo Y, Xu T, Zhu X** (2023) SPA, a Stigma-style-  
790 transmitting tract Physical microenvironment Assay for investigating mechano-signaling in  
791 pollen tubes. *Proc Natl Acad Sci* **120**: 2017
- 792 **Zhou X, Lu J, Zhang Y, Guo J, Lin W, Van Norman JM, Qin Y, Zhu X, Yang Z** (2021)  
793 Membrane receptor-mediated mechano-transduction maintains cell integrity during pollen  
794 tube growth within the pistil. *Dev Cell* **56**: 1030-1042.e6
- 795 **Zhou Z, Shi H, Chen B, Zhang R, Huang S, Fu Y** (2015) Arabidopsis RIC1 Severs Actin  
796 Filaments at the Apex to Regulate Pollen Tube Growth. *Plant Cell* **27**: 1140–1161
- 797

798 **Figures**

799

800 **Figure 1: GEF8 and GEF9 specifically accumulate at the pollen germination site before**  
801 **germination initiation.**

802 (A) Protein localisation of mCit-GEF8, mCit-GEF9, and mCit-GEF12 under their respective  
803 promoters during pollen germination. Timepoint 0 corresponds to the beginning of pollen tube  
804 emergence, arrowheads mark the site of pollen emergence, and asterisks mark mCit-GEF9  
805 localisation around the sperm cells. (B) Kymographs of time-lapse images corresponding to  
806 (A) along a line crossing the pollen through the germination site (left) or around the pollen  
807 grain (right). The dotted line indicates Timepoint 0 of pollen tube emergence; arrowheads  
808 highlight protein accumulations at the pollen germination site. (C & D) Average intensity  
809 profiles of mCit-GEF8 (n=13) and mCit-GEF9 (n=12) at the pollen germination site in relation  
810 to the opposite side of the pollen grain during pollen germination. (E & F) Colocalization (left)  
811 and intensity profiles along a line, as indicated in the merged image, across the pollen grain  
812 through the pollen germination site (right) of mCit-GEF8 with mSct-GEF9 (E) and mCit-GEF12  
813 with mSct-GEF9 (F) expressed under their respective promoters. All scale bars represent 10  
814  $\mu\text{m}$ .

815

816 **Figure 2: GEF8, GEF9, and GEF12 are necessary for pollen germination and male**  
817 **fertility.**

818 (A) Quantification of pollen germination efficiency of *in vitro* germinated pollen 4 h after  
819 imbibition on pollen germination media (PGM). Each point represents one replicate with more  
820 than 150 pollen grains. Tukey's multiple comparison test was performed by one-way ANOVA,  
821 and groups of statistically significant differences are indicated with letters ( $p < 0.0001$ ). (B)  
822 Representative images of *in vitro* germinated pollen 4 h after imbibition on PGM. (C)  
823 Quantification of mutant allele frequency in F1 generation of reciprocal crosses with Col-0 as  
824 female and the indicated mutants as pollen donors. The heterozygous allele of each genotype  
825 is indicated in bold. Asterisks indicate a significant difference in the allele frequency from the  
826 expected 50% according to  $X^2$ -test ( $p < 0.05$ ).

827

828 **Figure 3: The C-terminus of GEF8 and GEF9 is necessary and sufficient for protein**  
829 **accumulation.**

830 (A) AlphaFold2 protein structure prediction of full-length GEF8 and ROP1 (Rank 1, predicted  
831 separately), matched on the PRONE8-ROP4 double-dimer structure (PDB: 2NTY). Different  
832 angles are shown, and the terminal regions are indicated with different colours. (B) Schemes  
833 of GEF protein structure and investigated truncation constructs, with variable N and C terminal  
834 domains indicated as in (A). (C – E) Protein localisation of different mutant constructs under

835 their respective promoters during pollen germination. Timepoint 0 corresponds to the  
836 beginning of pollen tube emergence, arrowheads mark the site of pollen emergence, and  
837 asterisks mark localisation around the sperm cells. (C) Truncation constructs mCit-GEF8<sup>AN</sup>,  
838 mCit-GEF8<sup>AC</sup>, mCit-GEF9<sup>AN</sup>, and mCit-GEF9<sup>AC</sup> in Col-0. (D) Domain swap constructs of  
839 GEF12 with alternative C-terminal domain, mCit-GEF12<sup>GEF8C</sup> and mCit-GEF12<sup>GEF9C</sup> in Col-0.  
840 (E) Phosphorylation site mutations of GEF8-S518 to a phospho-mimic (mCit-GEF8<sup>S518D</sup>) and  
841 phospho-dead variant (mCit-GEF8<sup>S518A</sup>) variant expressed in *gef8-cΔ1*. All scale bars  
842 represent 10μm.

843

844 **Figure 4: GEF8 is required for polar ROP activation and Ca<sup>2+</sup> signalling.**

845 (A) Localization of mCit-ROP1, mCit-ROP3, and mCit-ROP5 under their respective promoter  
846 during pollen germination. Timepoint 0 corresponds to the beginning of pollen tube  
847 emergence, and arrowheads mark the site of pollen emergence. (B) Kymographs of time-laps  
848 images corresponding to (A) along a line crossing the pollen through the germination site (left)  
849 or around the pollen grain (right). The dotted line indicates timepoint 0 of pollen tube  
850 emergence; arrowheads highlight protein accumulations at the pollen germination site. (C)  
851 Localisation of the ROP activity indicator *GEF12p::CRIB4-mCit* in Col-0 and *gef8-cΔ1*  
852 backgrounds. (D) Kymographs of time-laps images corresponding to (C) along a line crossing  
853 the pollen through the germination site (left) or around the pollen grain (right). Arrowheads  
854 highlight protein accumulations at the pollen germination site. (E) *LAT52p::RGeco1 Ca<sup>2+</sup>*  
855 biosensor in Col-0 and *gef8-cΔ1* background. (F) Kymographs of time-laps images  
856 corresponding to (E) along a line crossing the pollen through the germination site. Arrowhead  
857 highlights signal increase at the pollen germination site. All scale bars represent 10 μm.

858

859

860 **Supplemental Figures**

861

862 **Supplemental Figure S1: Phylogeny of all ROPGEFs of *Arabidopsis thaliana* and**  
863 **expression levels in mature pollen.**

864 (A) Phylogenetic tree of the 14 ROPGEFs of *Arabidopsis thaliana* after alignment of the full-  
865 length protein sequence in Jalview, using the integrated MUSCLE alignment tool and  
866 calculation of an average distance (BLOSUM62) tree. (B) Presence of transcript or protein for  
867 all 14 ROPGEFs in mature pollen, according to the ATHENA – *Arabidopsis thaliana*  
868 ExpressioN Atlas (Mergner et al., 2020). GEFs are sorted according to the phylogenetic tree.  
869 Levels of the transcript are shown in transcripts per kilobase million (TPM) and intensity-based  
870 absolute quantifications (iBAQ) for protein levels. NA indicates that no transcript or protein  
871 was detected in this tissue.

872

873 **Supplemental Figure S2: GEF11 and GEF13 do not accumulate at the pollen**  
874 **germination site.**

875 (A) Protein localisation of mCit-GEF11 under its own promoter and mCit-GEF13 under control  
876 of a *GEF12* promoter fragment during pollen germination. Timepoint 0 corresponds to the  
877 beginning of pollen tube emergence, and arrowheads mark the site of pollen emergence. (B)  
878 Example images of mCit-GEF13 under the control of a *GEF13* promoter fragment in mature  
879 pollen grains and pollen tubes grown through a cut pistil. In neither case, any signal could be  
880 detected. All scale bars represent 10 $\mu$ m.

881

882 **Supplemental Figure S3: Genomic structure and mutant allele information of GEF8,**  
883 **GEF9, and GEF12.**

884 (A-C) *GEF8*, *GEF9*, and *GEF12* genomic structures with the corresponding gRNA sites  
885 (scissors) and T-DNA insertion sites (arrowhead) for *gef9-t1* (GK-717A10) and *gef12-t1*  
886 (SALK\_103614). Promoter regions are shown as white boxes, UTRs in cyan, and exons in  
887 grey boxes. WT sequence for each gene and corresponding CRISPR/Cas9 deletion line is  
888 shown, and the size of CRISPR/Cas9 induced deletions is indicated. The gRNA target  
889 sequence is highlighted in colour with PAM in bold. The START and STOP codons are  
890 underlined. (D) *GEF9* genomic structure with T-DNA insertion sites (arrowhead) for *gef9-t1*  
891 (GK-717A10) and the location of primers used to test the mRNA presence is indicated. The  
892 table shows the expected PCR product size with the indicated primer combination for non-  
893 spliced templates (genomic) and correctly spliced templates (CDS). The gel image shows  
894 PCR products of PCRs using the indicated primer combination on cDNA from Arabidopsis  
895 flowers of Col-0 or *gef9-t1* plants.

896

897 **Supplemental Figure S4: Reciprocal crosses of GEF mutant lines**

898 Quantification of mutant allele frequency in F1 generation of reciprocal crosses with Col-0 as  
899 female and the indicated mutants as pollen donors (left) or indicated mutants as female and  
900 Col-0 as pollen donor (right). The heterozygous allele of each genotype is shown in bold.  
901 Asterisks indicate a significant difference in the allele frequency from the expected 50%  
902 according to  $X^2$ -test ( $p < 0.05$ )



## Figure 1: GEF8 and GEF9 specifically accumulate at the pollen germination site before germination initiation

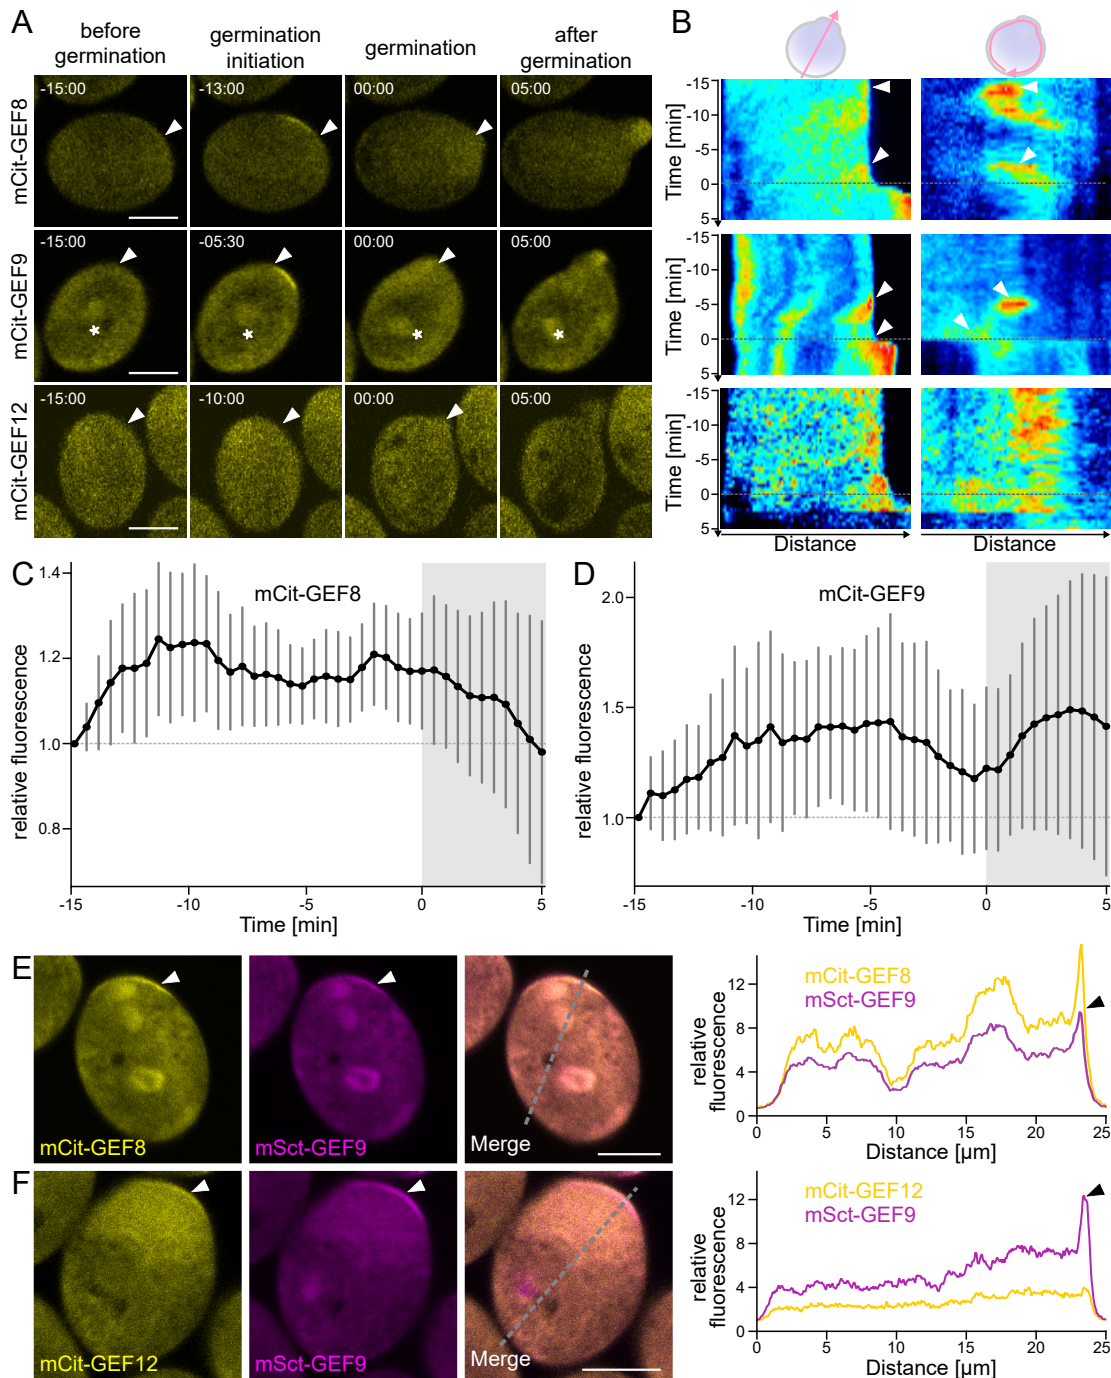

**(A)** Protein localisation of mCit-GEF8, mCit-GEF9, and mCit-GEF12 under their respective promoters during pollen germination. Timepoint 0 corresponds to the beginning of pollen tube emergence, arrowheads mark the site of pollen emergence, and asterisks mark mCit-GEF9 localisation around the sperm cells. **(B)** Kymographs of time-lapse images corresponding to (A) along a line crossing the pollen through the germination site (left) or around the pollen grain (right). The dotted line indicates Timepoint 0 of pollen tube emergence; arrowheads highlight protein accumulations at the pollen germination site. **(C & D)** Average intensity profiles of mCit-GEF8 ( $n=13$ ) and mCit-GEF9 ( $n=12$ ) at the pollen germination site in relation to the opposite side of the pollen grain during pollen germination. **(E & F)** Colocalization (left) and intensity profiles along a line, as indicated in the merged image, across the pollen grain through the pollen germination site (right) of mCit-GEF8 with mSct-GEF9 (E) and mCit-GEF12 with mSct-GEF9 (F) expressed under their respective promoters. All scale bars represent 10  $\mu\text{m}$ .

**Figure 2: GEF8, GEF9, and GEF12 are necessary for pollen germination and male fertility**

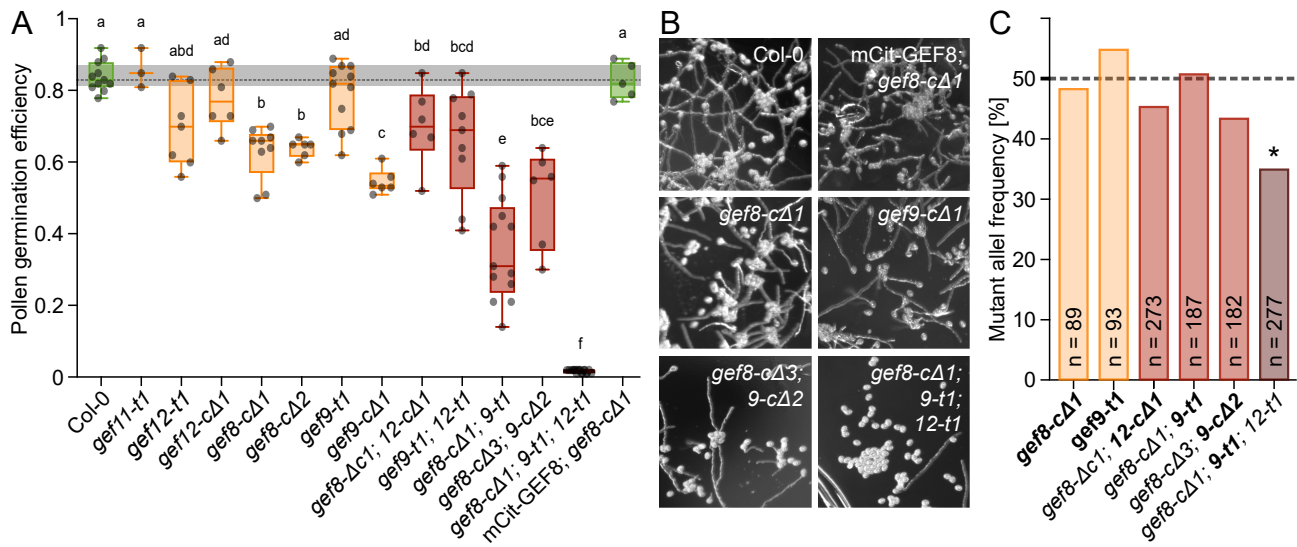

**(A)** Quantification of pollen germination efficiency of *in vitro* germinated pollen 4 h after imbibition on pollen germination media (PGM). Each point represents one replicate with more than 150 pollen grains. Tukey's multiple comparison test was performed by one-way ANOVA, and groups of statistically significant differences are indicated with letters (p < 0.0001). **(B)** Representative images of *in vitro* germinated pollen 4 h after imbibition on PGM. **(C)** Quantification of mutant allele frequency in F1 generation of reciprocal crosses with Col-0 as female and the indicated mutants as pollen donors. The heterozygous allele of each genotype is indicated in bold. Asterisks indicate a significant difference in the allele frequency from the expected 50% according to X2-test (p < 0.05).

### Figure 3: The C-terminus of GEF8 and GEF9 is necessary and sufficient for protein accumulation

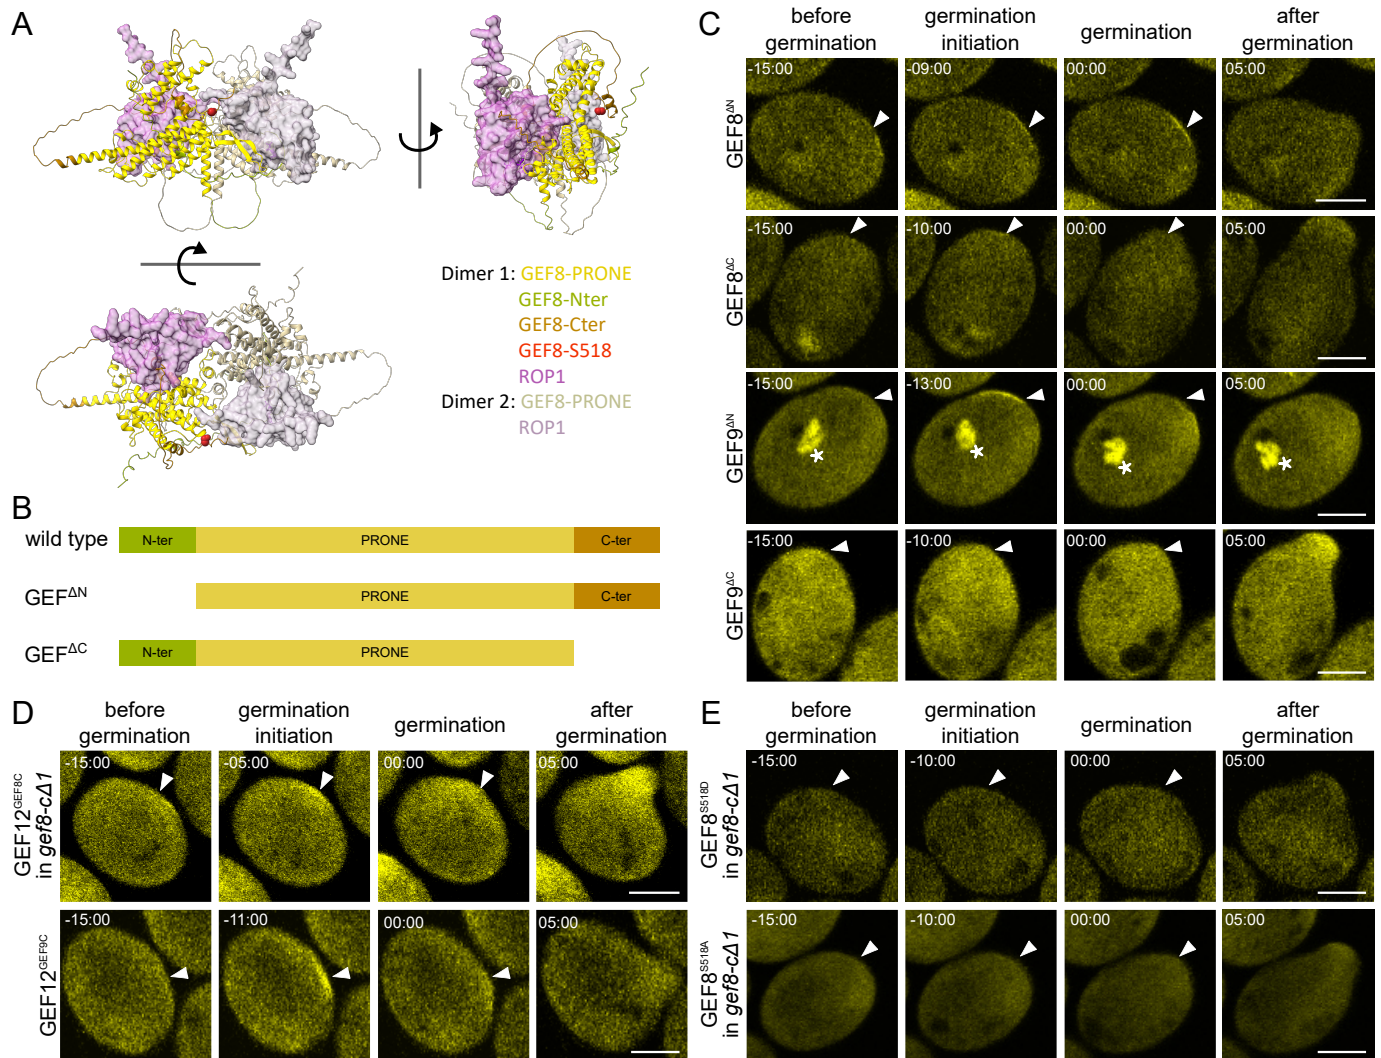

(A) AlphaFold2 protein structure prediction of full-length GEF8 and ROP1 (Rank 1, predicted separately), matched on the PRONE8-ROP4 double-dimer structure (PDB: 2NTY). Different angles are shown, and the terminal regions are indicated with different colours. (B) Schemes of GEF protein structure and investigated truncation constructs, with variable N and C terminal domains indicated as in (A). (C – E) Protein localisation of different mutant constructs under their respective promoters during pollen germination. Timepoint 0 corresponds to the beginning of pollen tube emergence, arrowheads mark the site of pollen emergence, and asterisks mark localisation around the sperm cells. (C) Truncation constructs mCit-GEF8<sup>ΔN</sup>, mCit-GEF8<sup>ΔC</sup>, mCit-GEF9<sup>ΔN</sup>, and mCit-GEF9<sup>ΔC</sup> in Col-0. (D) Domain swap constructs of GEF12 with alternative C-terminal domain, mCit-GEF12<sup>GEF8C</sup> and mCit-GEF12<sup>GEF9C</sup> in Col-0. (E) Phosphorylation site mutations of GEF8-S518 to a phospho-mimic (mCit-GEF8<sup>S518D</sup>) and phospho-dead variant (mCit-GEF8<sup>S518A</sup>) variant expressed in *gef8-cΔ1*. All scale bars represent 10μm.



## Figure 4: GEF8 is required for polar ROP activation and Ca<sup>2+</sup> signalling

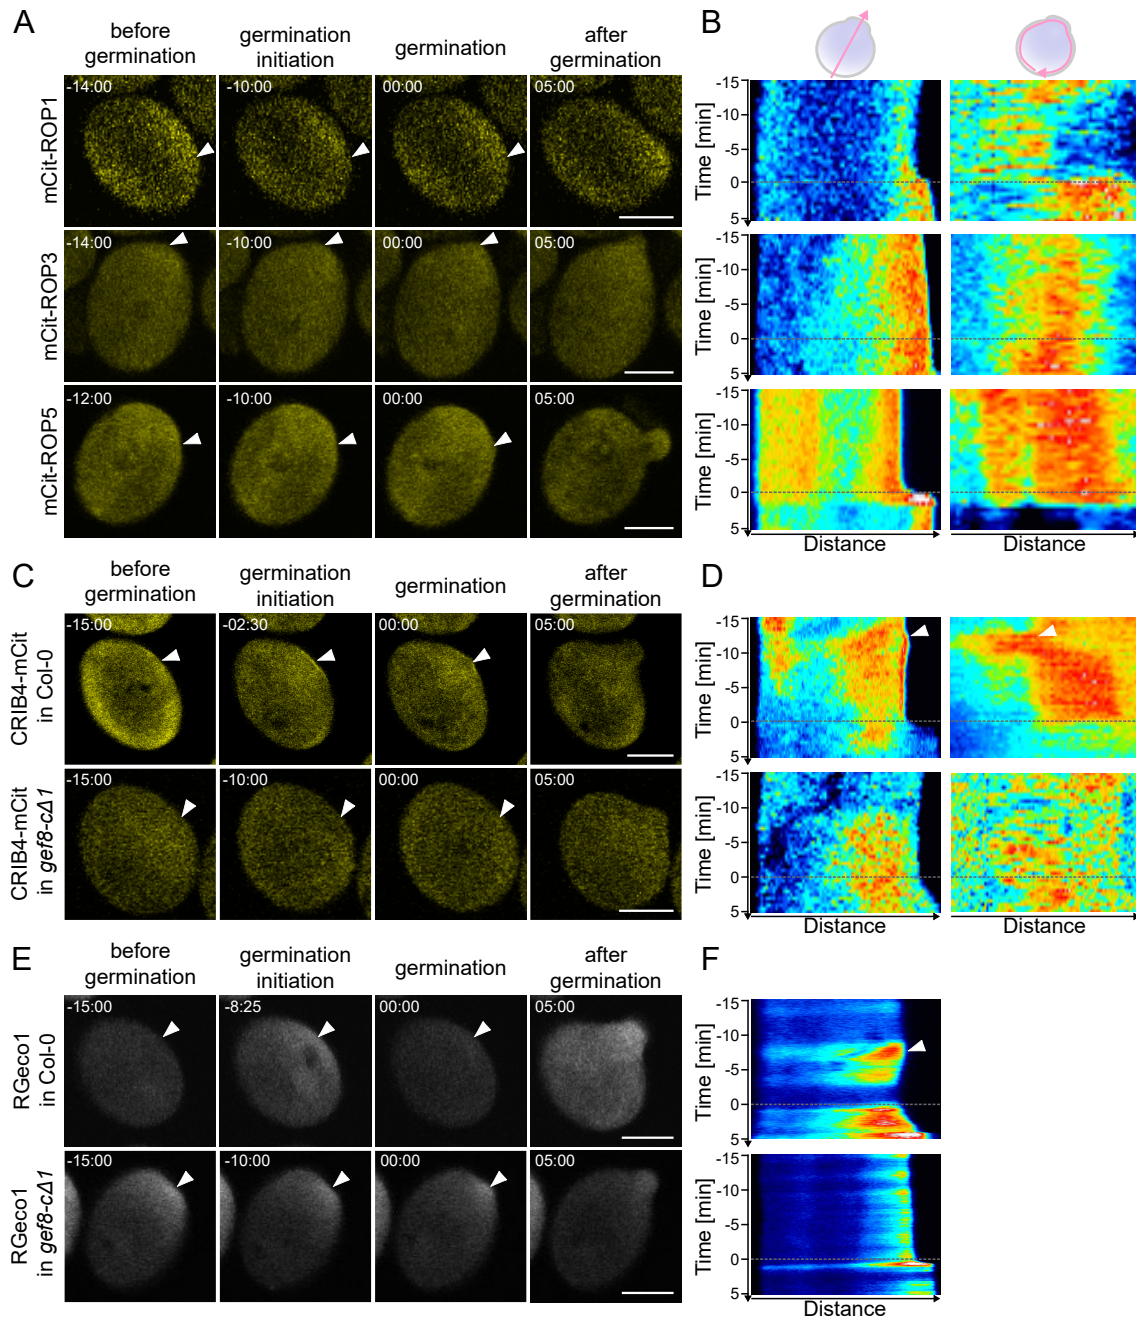

(A) Localization of mCit-ROP1, mCit-ROP3, and mCit-ROP5 under their respective promoter during pollen germination. Timepoint 0 corresponds to the beginning of pollen tube emergence, and arrowheads mark the site of pollen emergence. (B) Kymographs of time-laps images corresponding to (A) along a line crossing the pollen through the germination site (left) or around the pollen grain (right). The dotted line indicates timepoint 0 of pollen tube emergence; arrowheads highlight protein accumulations at the pollen germination site. (C) Localisation of the ROP activity indicator *GEF12p::CRIB4-mCit* in Col-0 and *gef8-cΔ1* backgrounds. (D) Kymographs of time-laps images corresponding to (C) along a line crossing the pollen through the germination site (left) or around the pollen grain (right). Arrowheads highlight protein accumulations at the pollen germination site. (E) *LAT52p::RGeco1* Ca<sup>2+</sup> biosensor in Col-0 and *gef8-cΔ1* background. (F) Kymographs of time-laps images corresponding to (E) along a line crossing the pollen through the germination site. Arrowhead highlights signal increase at the pollen germination site. All scale bars represent 10 μm.

## Supplemental Figure S1 : Phylogeny of all ROPGEFs of *Arabidopsis thaliana* and expression levels in mature pollen

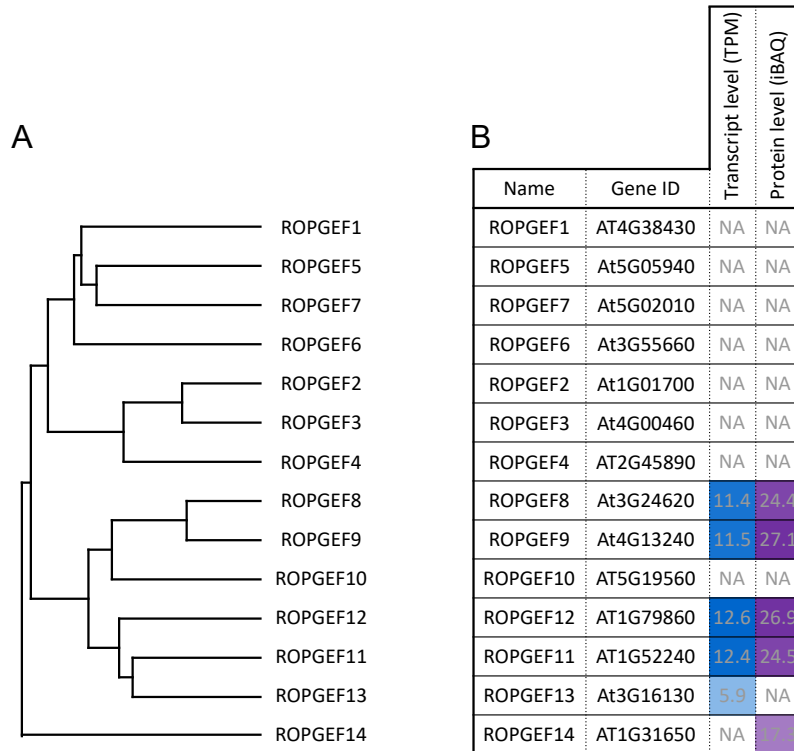

**(A)** Phylogenetic tree of the 14 ROPGEFs of *Arabidopsis thaliana* after alignment of the full-length protein sequence in Jalview, using the integrated MUSCLE alignment tool and calculation of an average distance (BLOSUM62) tree. **(B)** Presence of transcript or protein for all 14 ROPGEFs in mature pollen, according to the ATHENA – *Arabidopsis THaliana* ExpressioN Atlas (Mergner et al., 2020). GEFs are sorted according to the phylogenetic tree. Levels of the transcript are shown in transcripts per kilobase million (TPM) and intensity-based absolute quantifications (iBAQ) for protein levels. NA indicates that no transcript or protein was detected in this tissue.



**Supplemental Figure S2: GEF11 and GEF13 do not accumulate at the pollen germination site.**

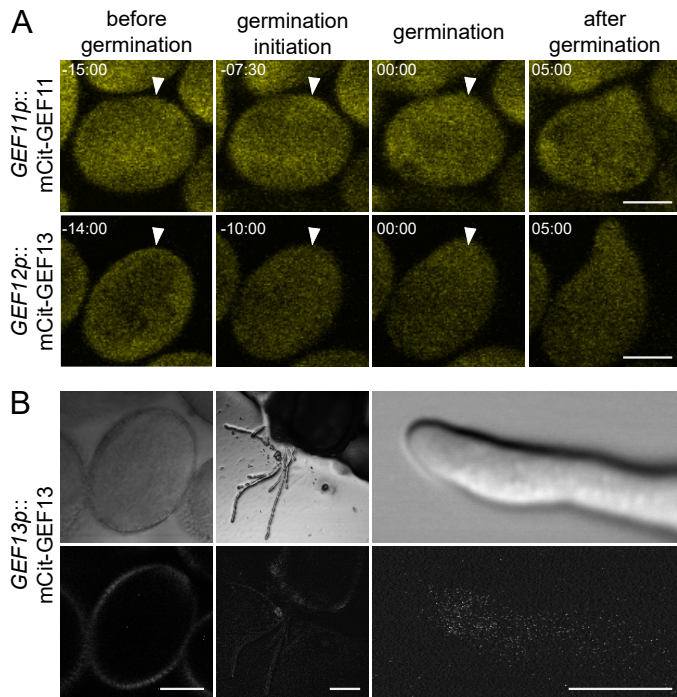

**(A)** Protein localisation of mCit-GEF11 under its own promoter and mCit-GEF13 under control of a *GEF12* promoter fragment during pollen germination. Timepoint 0 corresponds to the beginning of pollen tube emergence, and arrowheads mark the site of pollen emergence. **(B)** Example images of mCit-GEF13 under the control of a *GEF13* promoter fragment in mature pollen grains and pollen tubes grown through a cut pistil. In neither case, any signal could be detected. All scale bars represent 10 $\mu$ m.

## Supplemental Figure S3: Genomic structure and mutant allele information of GEF8, GEF9, and GEF12

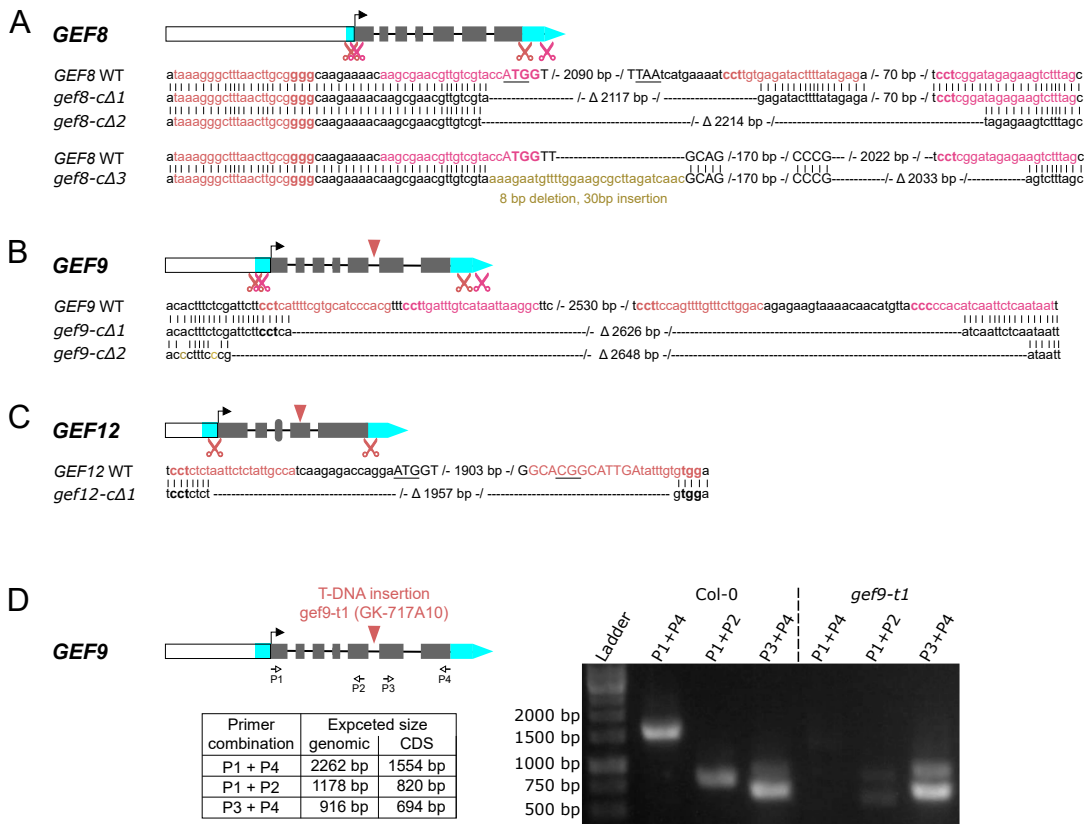

(A-C) *GEF8*, *GEF9*, and *GEF12* genomic structures with the corresponding gRNA sites (scissors) and T-DNA insertion sites (arrowhead) for *gef9-t1* (GK-717A10) and *gef12-t1* (SALK\_103614). Promoter regions are shown as white boxes, UTRs in cyan, and exons in grey boxes. WT sequence for each gene and corresponding CRISPR/Cas9 deletion line is shown, and the size of CRISPR/Cas9 induced deletions is indicated. The gRNA target sequence is highlighted in colour with PAM in bold. The START and STOP codons are underlined. (D) *GEF9* genomic structure with T-DNA insertion sites (arrowhead) for *gef9-t1* (GK-717A10) and the location of primers used to test the mRNA presence is indicated. The table shows the expected PCR product size with the indicated primer combination for non-spliced templates (genomic) and correctly spliced templates (CDS). The gel image shows PCR products of PCRs using the indicated primer combination on cDNA from *Arabidopsis* flowers of Col-0 or *gef9-t1* plants.

### Supplemental Figure S4: Reciprocal crosses of GEF mutant lines

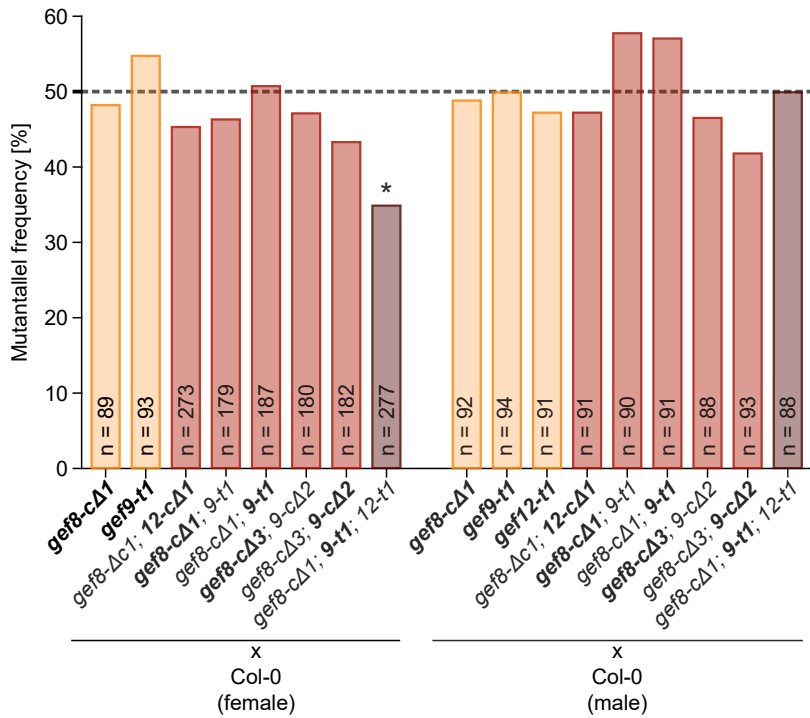

Quantification of mutant allele frequency in F1 generation of reciprocal crosses with Col-0 as female and the indicated mutants as pollen donors (left) or indicated mutants as female and Col-0 as pollen donor (right). The heterozygous allele of each genotype is shown in bold. Asterisks indicate a significant difference in the allele frequency from the expected 50% according to X2-test ( $p < 0.05$ ).

## Supplemental Table S1: List of primers

| Primer Name                         | Sequence                                                 | Primer ID    |
|-------------------------------------|----------------------------------------------------------|--------------|
| GEF8 Promoter with GG-Overhang A    | aacaGGTCTCtACCTatggagatggattcaaggctga                    | oPDR076-F    |
| GEF8 Promoter with GG-Overhang B    | aacaGGTCTCaTGTTggtacgacaacgttcgcttg                      | oPDR076-R    |
| GEF8 ORF_GG-Overhang C + ca         | aacaGGTCTCaGGCTcaATGGTTCAGCGTTGGAACG                     | oPDR077-F    |
| GEF8 ORF_GG-Overhang D_STOP         | aacaGGTCTCaCTGATTAATGCCTATCTTTGGGACTTCTAAAAC             | oPDR077-R    |
| GEF8 DeltaN_with ATG and STOP       | aacaGGTCTCaggctcaATGGGAAAAAGATCTGAGAGACAACA              | oALM16-F     |
|                                     | aacaGGTCTCaCTGATTAATGCCTATCTTTGGGACTTCTAAAAC             | oPDR77R      |
| GEF8 DeltaC_with ATG and STOP       | aacaGGTCTCaGGCTcaATGGTTCAGCGTTGGAACG                     | oPDR77F      |
|                                     | aacaGGTCTCaggctcaATGGGAAAAAGATCTGAGAGACAACA              | oALM16-R     |
| GEF9 Promoter with GG-Overhang A    | aacaGGTCTCtACCTggggagacaataaaaagatcaaaagtatg             | oPDR078-F    |
| GEF9 Promoter with GG-Overhang B    | aacaGGTCTCaTGTTggtaccaaacccttctttttcttc                  | oPDR078-R    |
| GEF9 ORF_GG-Overhang C + ca         | aacaGGTCTCaGGCTcaATGGTTCATCGTTGGAACGA                    | oPDR079-F    |
| GEF9 ORF_GG-Overhang D_STOP         | aacaGGTCTCaCTGATCAATGCCTATCTTTAGGGCTCC                   | oPDR079-R    |
| GEF9 DeltaN_with ATG and STOP       | aacaGGTCTCaggctcaATGTCCCGTAGACAGGACAAGCAACAATCCGAGACG    | oABM48-F     |
|                                     | aacaGGTCTCaCTGATCAATGCCTATCTTTAGGGCTCC                   | oPDR79-R     |
| GEF9 DeltaC_with ATG and STOP       | aacaGGTCTCaGGCTcaATGGTTCATCGTTGGAACGA                    | oPDR79-F     |
|                                     | aacaGGTCTCaCTGATTCACCTGTGCATTGCTTCCGGGCTAA               | oABM49-R     |
| GEF12 Promoter with GG-Overhang A   | aacaGGTCTCtACCTatctcctttctctgtttttttttttttcttc           | oPD0139-fwd  |
| GE12 Promoter with GG-Overhang B    | aacaGGTCTCaTGTTtctggtcccttgatggcaatagag                  | oPD0139-rev  |
| GEF12 Part A with GG-Overhang C     | aacaGGTCTCtGGCTATGGTTCGTGCTTCGGAACA                      | oPD0140A-fwd |
| GEF12 Part A for Bsal-Site mutation | aacaGGTCTCGATCCGGTGGCAGCCTCATCTAAACC <b>a</b> GTCTCGAC   | oPD0140A-rev |
| GEF12 Part B                        | aacaGGTCTCCGGATCCCATGACGCTGAA                            | oPD0140B-fwd |
| GEF12 Part B                        | aacaGGTCTCTCTCGCTTCTCCAGACTTACTC                         | oPD0140B-rev |
| GEF12 Part C for Bsal-Site mutation | aacaGGTCTCGCGAGAGGTCTTCGAAGAGCGAGCTGA <b>a</b> ACCATTTTG | oPD0140C-fwd |
| GEF12 Part C with GG-Overhang D     | aacaGGTCTCtCTGATCAATGCCGTGCCGTTGG                        | oPD0140C-rev |
| GEF12Nter-PRONE                     | aacaGGTCTCtGGCTcaATGGTTCGTGCTTCGGAACA                    | oPDM22F      |
|                                     | aacaGGTCTCtGCTTGTTCCCGCTCGATCTGC                         | oABM71-RA    |
| GEF8 Cter                           | aacaGGTCTCaAAGCAAACCTTTATTGGCTGAAGA                      | oABM071-R-B  |
|                                     | aacaGGTCTCaCTGATTAATGCCTATCTTTGGGACTTCTAAAAC             | oPDR77R      |
| GEF9 Cter                           | aacaGGTCTCcaAGCAATGCACAGGTGAAGAA                         | oABM072-R-B  |
|                                     | aacaGGTCTCaCTGATCAATGCCTATCTTTAGGGCTCC                   | oABM79R      |

|                                      |                                                            |            |
|--------------------------------------|------------------------------------------------------------|------------|
| CRISPR GEF8 deletion gef8-c1         | aacaGGTCTCgATTGagcgaacggtgtcgtaccaGTTTTAGAGCTAGAAATAGC     | oABM01-F   |
|                                      | aacaGGTCTCgAAACtgtgagatactttatagacAATCTCTTAGTCGACTCTAC     | oABM01-R   |
| CRISPR GEF8 Pair 1 Stuttmann Cloning | acaGAAGACtGATTGtaaaggccttaacttgcgGTTTCAGAGCTATGCTGGAAACA   | oABM73-F   |
|                                      | acaGAAGACtGAAACcggatagagaagcttttagCAATCACTACTTCGACTCTAGCTG | oABM73-R   |
| CRISPR GEF8 Pair 2 Stuttmann Cloning | acaGAAGACtGATTGagcgaacggtgtcgtaccaGTTTCAGAGCTATGCTGGAAACA  | oABM74-F   |
|                                      | acaGAAGACtGAAACtgtgagatactttatagaCAATCACTACTTCGACTCTAGCTG  | oABM74-R   |
| CRISPR GEF9 Pair 1 Stuttmann Cloning | acaGAAGACtGATTGcgtgggatgcacgaaaatgGTTTCAGAGCTATGCTGGAAACA  | oABM75-F   |
|                                      | acaGAAGACtGAAACtccagttttgttcttgacAATCACTACTTCGACTCTAGCTG   | oABM75-R   |
| CRISPR GEF9 Pair 2 Stuttmann Cloning | acaGAAGACtGATTgccttaattatgacaaatcaGTTTCAGAGCTATGCTGGAAACA  | oABM76-F   |
|                                      | acaGAAGACtGAAACcacatcaattctcaataatCAATCACTACTTCGACTCTAGCTG | oABM76-R   |
|                                      |                                                            |            |
| gef8-c1 genotyping                   | agtccataaaatcgaaaacaaacgt                                  | oABM18-LP  |
|                                      | ctttggagtttgaccatacgc                                      | oABM18-RP  |
|                                      | GGACATGTCGACAGAGCACA                                       | oABM18-Int |
| gef9-c2 genotyping                   | acggaagcacaaccactga                                        | oABM19-LP  |
|                                      | acgactcatgtgcacacac                                        | oABM19-RP  |
|                                      | tgcccttgagtcgagtggt                                        | oABM19-Int |
| gef9-t1 genotyping                   | GGCACTATCAAATGCCATCAC                                      | oFA009_LP  |
|                                      | TCTTTTCCATATAACGATTGAGG                                    | oFA009_RP  |
| gef11-t1 genotyping                  | TCAGAGAGAGGTCAAATTGAGG                                     | oPD0168-LP |
|                                      | TACCTGCGAGATTGGTAATGG                                      | oPD0168-RP |
| gef12-t1 genotyping                  | AGGAGTATCCTCTGCTCTCGC                                      | oPDM008-LP |
|                                      | ATGATTGATGCCTCGATTCTG                                      | oPDM008-RP |



**Supplemental Table S2: List of cloned expression vectors**

|                                  |                                      | Promoter          | N-terminal Tag                         | ORF / CDS              | C-terminal Tag     | Terminator | Plant selection | Expression Vector | Bacterial selection marker | Plasmid ID |
|----------------------------------|--------------------------------------|-------------------|----------------------------------------|------------------------|--------------------|------------|-----------------|-------------------|----------------------------|------------|
|                                  |                                      | Module A          | Module B                               | Module C               | Module D           | Module E   | Module F        | Module Z          |                            |            |
| <b>Green Gate Vector Cloning</b> | <b>mCit-GEF8</b>                     | GEF8-Promoter     | mCitrine w/ Linker                     | GEF8-ORF               | Decoy              | HSP18.2    | Basta           | pGGZ003           | Spec/Strep                 | pPDR124    |
|                                  | <b>mCit-GEF9</b>                     | GEF9-Promoter     | mCitrine w/ Linker                     | GEF9-ORF               | Decoy              | HSP18.2    | Basta           | pGGZ003           | Spec/Strep                 | pPDR125    |
|                                  | <b>mCit-GEF12</b>                    | GEF12-Promoter    | mCitrine w/ Linker                     | GEF12-ORF              | Decoy              | HSP18.2    | Basta           | pGGZ003           | Spec/Strep                 | pPD0304    |
|                                  | <b>mSct-GEF8</b>                     | GEF8-Promoter     | mScarlet w/ Linker                     | GEF8-ORF               | Decoy              | HSP18.2    | Hygromycine     | pGGX000           | Kanamycince                | pABM04     |
|                                  | <b>mSct-GEF9</b>                     | GEF9-Promoter     | mScarlet w/ Linker                     | GEF9-ORF               | Decoy              | HSP18.2    | Hygromycine     | pGGX000           | Kanamycince                | pABM05     |
|                                  | <b>mSct-GEF12</b>                    | GEF12-Promoter    | mScarlet w/ Linker                     | GEF12-ORF              | Decoy              | HSP18.2    | Hygromycine     | pGGX000           | Kanamycince                | pABM06     |
|                                  | <b>mCit-GEF8<math>\Delta</math>N</b> | GEF8-Promoter     | mCitrine w/ Linker                     | GEF8-ORF $\Delta$ N    | Decoy              | HSP18.2    | Basta           | pGGYR0            | Spec/Strep                 | pABM93     |
|                                  | <b>mCit-GEF8<math>\Delta</math>C</b> | GEF8-Promoter     | mCitrine w/ Linker                     | GEF8-ORF $\Delta$ C    | Decoy              | HSP18.2    | Basta           | pGGYR0            | Spec/Strep                 | pABM94     |
|                                  | <b>mCit-GEF9<math>\Delta</math>N</b> | GEF9-Promoter     | mCitrine w/ Linker                     | GEF9-ORF $\Delta$ N    | Decoy              | HSP18.2    | Basta           | pGGYR0            | Spec/Strep                 | pABM76     |
|                                  | <b>mCit-GEF9<math>\Delta</math>C</b> | GEF9-Promoter     | mCitrine w/ Linker                     | GEF9-ORF $\Delta$ C    | Decoy              | HSP18.2    | Basta           | pGGYR0            | Spec/Strep                 | pABM77     |
|                                  | <b>mCit-GEF12GEF8Cter</b>            | GEF12-Promoter    | mCitrine w/ Linker                     | GEF12-ORF+<br>GEF8Cter | Decoy              | HSP18.2    | Basta           | pGGYR0            | Spec/Strep                 | pABM83     |
|                                  | <b>mCit-GEF12GEF9Cter</b>            | GEF12-Promoter    | mCitrine w/ Linker                     | GEF12-ORF+<br>GEF9Cter | Decoy              | HSP18.2    | Basta           | pGGYR0            | Spec/Strep                 | pABM84     |
|                                  | <b>Gef12p::RIC4-CRIB:mCit</b>        | GEF12-Promoter    | Omega element for enhanced translation | RIC4-CRIB              | mCitrine w/ Linker | HSP18.2    | Basta           | pGGYR0            | Spec/Strep                 | pPDM117    |
|                                  | <b>Lat52::RGeco1</b>                 | Lat52 promoter    | Decoy                                  | RGeco1                 | Decoy              | HSP18.4    | Hygromycine     | pGGX000           | Kanamycince                | pFA18      |
|                                  | <b>GEF8 GEF9 CRISPR</b>              | GEF8 gRNAs-pair 1 | GEF8 gRNAs- pair 2                     | GEF9 gRNAs-pair 1      | GEF9 gRNAs-pair 2  | -          | -               | pDGE347           | Spec/Strep                 | pABM90     |
